## 1 **APOBEC2 is a Transcriptional Repressor required for proper Myoblast Differentiation**

2  
3 Jose Paulo Lorenzo<sup>1a</sup>, Linda Molla<sup>2a</sup>, Ignacio L. Ibarra<sup>3,4</sup>, Sandra Ruf<sup>1</sup>, Jana Ridani<sup>5,6</sup>,  
4 Poorani Ganesh Subramani<sup>5,6</sup>, Jonathan Boulais<sup>5</sup>, Dewi Harjanto<sup>2</sup>, Alin Vonica<sup>7</sup>, Javier M. Di  
5 Noia<sup>5,6,8</sup>, Christoph Dieterich<sup>9</sup>, Judith B. Zaugg<sup>3</sup>, F. Nina Papavasiliou<sup>\*1,2</sup>

### 6 7 **Affiliations:**

8 <sup>1</sup> Division of Immune Diversity, German Cancer Research Center (DKFZ), 69120  
9 Heidelberg, Germany

10 Faculty of Biosciences, Heidelberg University, 69117 Heidelberg, Germany

11 <sup>2</sup> Laboratory of Lymphocyte Biology, The Rockefeller University, New York, NY 10065, USA

12 <sup>3</sup> Structural and Computational Biology Unit, European Molecular Biology Laboratory,  
13 Heidelberg, Germany

14 <sup>4</sup> Institute of Computational Biology, Helmholtz Zentrum München, German Research Center  
15 for Environmental Health, Neuherberg, Germany

16 <sup>5</sup> Institut de Recherches Cliniques de Montréal, 110 av. des Pins Ouest, Montréal, QC,  
17 Canada H2W 1R7

18 <sup>6</sup> Department of Medicine, Division of Experimental Medicine, McGill University, 1001 boul  
19 Decarie, Montréal, QC, Canada H4A 3J1

20 <sup>7</sup> Department of Biology, The Nazareth College, Rochester, NY 14618, USA

21 <sup>8</sup> Department of Medicine, Université de Montréal, C.P. 6128, succ. Centre-ville, Montréal,  
22 QC, Canada, H3C 3J7

23 <sup>9</sup> Klaus Tschira Institute for Integrative Computational Cardiology, University Hospital  
24 Heidelberg, Heidelberg, Germany

25  
26 <sup>a</sup>These authors contributed equally to the work

27 \*Corresponding Author: F. Nina Papavasiliou ([n.papavasiliou@dkfz-heidelberg.de](mailto:n.papavasiliou@dkfz-heidelberg.de))

### 28 29 30 31 **ABSTRACT**

32  
33  
34 The activation induced cytidine deaminase/apolipoprotein B editing complex (AID/APOBEC)  
35 family comprises several nucleic acid editors with roles ranging from antibody diversification  
36 to mRNA editing. APOBEC2, an evolutionarily conserved member of this family, has neither  
37 an established substrate nor a mechanism of action, however genetic evidence suggests  
38 functional relevance in tissues such as muscle. Here, we demonstrate that in muscle,  
39 APOBEC2 does not have any of the attributed molecular functions of the AID/APOBEC  
40 family, such as RNA editing, DNA demethylation, or DNA mutation. Instead, we show that  
41 APOBEC2 occupies chromatin at promoter regions of certain genes, whose expression is  
42 repressed during muscle cell differentiation. We further demonstrate that APOBEC2 on one  
43 hand binds promoter region DNA directly and in a sequence specific fashion, while on the  
44 other it interacts with HDAC transcriptional corepressor complexes. Therefore, APOBEC2,  
45 by actively repressing the expression of non-myogenesis pathway genes, plays a key role in  
46 enforcing the proper establishment of muscle cell fate.

47  
48

49           The AID/APOBEC proteins are zinc-dependent deaminases that catalyze the  
50 removal of the amino group from a cytidine base in the context of a polynucleotide chain,  
51 resulting in cytidine (C) to uridine (U) transition on DNA or RNA. Members of the  
52 AID/APOBEC family are closely related to one another based on homology and conservation  
53 of the cytidine deaminase domain containing a zinc-dependent deaminase sequence motif <sup>1</sup>.  
54 However, they differ by tissue-specific expression, substrates, and biological functions  
55 (reviewed in <sup>2</sup>). Physiologically these proteins alter the informational content encoded in the  
56 genome through a range of processes: acting as messenger RNA (mRNA) editors, affecting  
57 translation (APOBEC1) <sup>3,4</sup>, acting as DNA mutators to create novel gene variants, restrict  
58 viruses and retrotransposons (AID and APOBEC3) (reviewed in <sup>5</sup>) and, changing DNA 5mC  
59 modification levels, leading to modulation of transcript abundance (AID and APOBEC1) <sup>6,7</sup>.

60  
61           APOBEC2 is an evolutionarily conserved member of the AID/APOBEC family <sup>8</sup>.  
62 Substantial evidence highlights the biological relevance of APOBEC2 in metazoans. In mice,  
63 APOBEC2 is highly expressed in cardiac and skeletal muscle where it affects muscle  
64 development <sup>9</sup>. Specifically, in the absence of APOBEC2, there is a shift from fast to slow  
65 muscle fiber formation, a reduction in muscle mass, and a mild myopathy with age <sup>10</sup>. In  
66 zebrafish, APOBEC2 has been implicated in muscle fiber arrangement <sup>11</sup> and in retina and  
67 optic axon regeneration <sup>12</sup>. In frogs, APOBEC2 is important in left-right axis specification  
68 during early embryogenesis <sup>13</sup>. Mutations and gene expression changes of APOBEC2 have  
69 also been linked to cancer development <sup>14,15</sup>.

70  
71           Even though there is evidence for a biological role of APOBEC2, there are few  
72 insights to the mechanism by which APOBEC2 accomplishes these. Moreover, there has  
73 been no definite demonstration of its activity as a cytidine deaminase. Based on its  
74 homology with the other AID/APOBEC family members, it has been hypothesized that  
75 APOBEC2 may be involved in RNA editing <sup>9,14</sup> or DNA demethylation <sup>6,7,12</sup>. It has also been  
76 hypothesized that it has lost its deaminase activity altogether and may act biologically by a  
77 different mechanism <sup>16</sup>. However, there is currently a lack of knowledge on the direct  
78 physiological targets of APOBEC2, and its mechanism of action.

79  
80           To answer some of these questions, we performed knockdown studies of APOBEC2  
81 during the differentiation of the C2C12 murine myoblast cell line to systematically  
82 characterize the transcriptome and DNA methylation patterns of APOBEC2 deficient C2C12  
83 cells. Our results confirm the requirement of APOBEC2 for myoblast to myotube  
84 differentiation. Additionally, we demonstrate the requirement of its amino-terminal disordered  
85 region for nuclear localization and myotube differentiation. While our results do not support

86 APOBEC2 roles on RNA editing and on DNA methylation, we find that APOBEC2  
87 downregulation leads to substantial gene expression changes affecting programs associated  
88 with myogenesis. Moreover, genomic occupancy experiments demonstrate that APOBEC2  
89 interacts with chromatin at promoters of genes that are repressed during myoblast  
90 differentiation. Furthermore, these targets are derepressed with reduced abundance of  
91 APOBEC2, which allude to APOBEC2 acting as a transcriptional repressor. Notably, these  
92 target derepressed genes are not directly involved in myogenesis or muscle differentiation;  
93 instead they seem enriched for genes in the innate immune / inflammatory pathway. Finally,  
94 we show that APOBEC2 directly interacts with DNA as well as Histone Deacetylase 1  
95 (HDAC1) repressor complexes, which supports the molecular function of APOBEC2 as a  
96 transcriptional repressor. Taken together, our data suggest that APOBEC2 has a direct role  
97 in regulating active gene transcription during myoblast differentiation as a transcriptional  
98 repressor.

99

### 100 ***APOBEC2 is required for myoblast to myotube differentiation***

101

102 The C2C12 myoblast cell line was derived from mouse satellite cells activated to  
103 proliferate after muscle injury in adult mice <sup>17</sup>. C2C12 myoblasts are thought to recapitulate  
104 the first steps of muscle differentiation in culture and upon differentiation induce APOBEC2  
105 expression <sup>13</sup> (Supplementary Fig. 1A), making them a suitable model to investigate putative  
106 roles of this suspected cytidine deaminase in situ.

107

108 To explore the role of APOBEC2 during myogenesis, we reduced APOBEC2 protein  
109 levels with short hairpin RNA (shRNA) against APOBEC2 mRNA. Protein reduction was  
110 efficient and coincided with reduced myoblast-to-myotube differentiation, evidenced by the  
111 decrease in expression of TroponinT and myosin heavy chain (MyHC), protein markers of  
112 late differentiation (Fig. 1A). At the cellular level downregulation of APOBEC2 protein levels  
113 coincided with reduced myotube formation (Fig. 1B). These observations match those  
114 previously reported using mouse embryonic stem cell-derived myogenic precursors <sup>18</sup>.

115

116 We then restored APOBEC2 protein in these knockdown cells through  
117 overexpression. This led to an increase in MyHC levels, which confirms the essential role of  
118 APOBEC2 in myoblast differentiation in this model (Fig.1C). Additionally, we produced  
119 truncated APOBEC2 (residues 41-224 mouse APOBEC2) based on its published structures  
120 <sup>19,20</sup>. Truncated APOBEC2 (del(2-40)A2), was unable to restore MyHC expression levels.  
121 Interestingly, the truncated form of APOBEC2 was only found in the cytoplasmic fraction of  
122 differentiated C2C12 myoblasts (Supplementary Fig. 1C). We speculated that the nuclear

123 localization of APOBEC2 was necessary for its role in muscle differentiation and pointed to a  
124 molecular function within the nuclear compartment.

125

### 126 ***APOBEC2 loss leads to gene expression changes related to muscle differentiation***

127

128 To study how APOBEC2 loss leads to problems in C2C12 myoblast-to-myotube  
129 differentiation, we performed RNA sequencing (RNA-Seq) to compare the transcriptome  
130 dynamics of APOBEC2 knockdown and control cells during differentiation. We observed that  
131 reduced APOBEC2 levels led to substantial gene expression changes (Fig. 1D,E). Notably,  
132 genes downregulated during differentiation were enriched for muscle development Gene  
133 Ontology (GO) terms, whereas genes upregulated were enriched for GO terms related to  
134 immune response (Fig. 1C; Supplementary File 1). The decreased expression of muscle  
135 differentiation related genes reflects the observed reduced myotube formation. Though  
136 undetectable on the immunoblot (Fig. 1A), perturbation of APOBEC2 levels prior to inducing  
137 differentiation seems to affect the potential of C2C12 to differentiate into myotubes. Genes  
138 involved in muscle development or function were also downregulated at day 0 prior to  
139 inducing the cells to differentiate.

140

141 Furthermore, genes related to cell development or differentiation GO terms,  
142 particularly immune system development, blood vessel development, and nervous system  
143 development, are among those overrepresented in the list of upregulated genes with  
144 APOBEC2 deficiency (Supplementary File 2). These spurious non-muscle transcriptional  
145 programs possibly reflect transdifferentiation events, which have been observed for C2C12  
146 myoblasts <sup>21</sup>.

147

148 We next investigated possible molecular mechanisms of how APOBEC2 causes  
149 these gene expression changes. Due to the conserved cytidine deaminase domain within  
150 the AID/APOBEC family, APOBEC2 is posited to be an RNA editor <sup>9,14</sup> and a DNA  
151 demethylase <sup>6,7,12</sup>. Upon comparing the transcriptomes of the APOBEC2 knockdown and  
152 control C2C12 cells for instances of C-to-U RNA editing, using a previously validated  
153 pipeline <sup>22</sup>, we could not identify C-to-U or A-to-I RNA editing events that were APOBEC2  
154 dependent (Supplementary Fig. 2A). Similarly, using bisulfite sequencing, we were unable to  
155 observe significant methylation differences between the APOBEC2 knockdown and control  
156 C2C12 cells that could account for the gene expression changes (Supplementary Fig. S2B-  
157 C). Altogether, these results strongly indicate that APOBEC2 is neither involved in mRNA  
158 deamination nor DNA demethylation in differentiating muscle.

159

160

161 ***APOBEC2 binds promoter regions***

162

163

164 Cytidine deaminases of the AID/APOBEC family can bind and mutate DNA either at  
165 gene bodies, e.g. exons of the immunoglobulin locus, as catalyzed by AID, reviewed in <sup>23</sup> or  
166 at promoter regions, e.g. local hypermutations as catalyzed by APOBEC3 family members -  
167 reviewed in <sup>24</sup>. To assess whether APOBEC2 could also bind genomic DNA, we first  
168 determined the subcellular localization of APOBEC2 in muscle cells. We observe that  
169 APOBEC2 is present in both the cytoplasm and nucleus of differentiated C2C12 myotubes  
170 (Fig. 2A, Supplementary Fig. 1C). A weak nuclear localization signal (NLS) can be predicted  
171 by cNLS Mapper <sup>25</sup> (APOBEC2 residues 26 to 57, with a score of 3.7) that could explain the  
172 lack of nuclear localization of truncated APOBEC2, del(2-40)A2. However, full length  
173 APOBEC2 does not show NLS activity but is homogenously distributed throughout the cell,  
174 presumably through passive diffusion <sup>26</sup>. To then assess whether nuclear APOBEC2 could  
175 bind chromatin, we utilized sequential salt extraction based on the principle that loosely  
176 bound proteins will be dissociated at low salt concentration, while tightly bound ones will not  
177 <sup>27</sup>. Using this technique, we found that a fraction of APOBEC2 within differentiating C2C12  
178 cells, remains bound to chromatin even at high salt concentrations (up to 1 M NaCl). As a  
179 comparison histone H4 dissociates completely from DNA at 0.75 M NaCl (Fig. 2B). These  
180 data suggest a strong association of nuclear APOBEC2 with chromatin in differentiating  
181 myoblasts.

181

182 To determine APOBEC2 binding localization within chromatin, we performed  
183 chromatin immunoprecipitation-sequencing (ChIP-Seq) experiments, and calculated  
184 enrichment of APOBEC2 at specific loci over input using MACS2 (see Methods). We  
185 performed each experiment in triplicate, and only peaks that were called in at least 2 out of 3  
186 replicates were analyzed. Importantly, we queried APOBEC2 occupancy at two different time  
187 points, 14- and 34-hours post-differentiation, that precede the RNA-Seq time points, where  
188 we observed changes in gene expression and represent time points of low and higher  
189 APOBEC2 protein abundance. Overall, the signal around peak summits of transcription start  
190 sites (TSS) is higher at 34 versus 14 hours, reflecting an increase of APOBEC2 in  
191 chromatin. In contrast, input controls show lower enrichment over the peak summits (Fig.  
192 2C).

193

194 Annotating the APOBEC2 peaks by genomic feature showed that for both time points  
195 most of the peaks fall within promoters, defined as regions -2 kilobases (kb) to +2 kb around  
196 the TSS (Fig. 2D). Next, we wanted to determine whether APOBEC2 occupies specific  
197 motifs within promoter regions. The members of the AID/APOBEC family that bind to DNA

198 have some local sequence preference with regard to sites they mutate, but do not display  
199 rigorous sequence specificity, e.g. akin to transcription factor (TF) binding sites<sup>28</sup>. To assess  
200 the motif signatures in those regions we queried through motif enrichment the over-  
201 representation of TF 8-mers sequences associated to main TF modules<sup>29</sup>. Among 108 TF  
202 modules tested against a controlled background of negative sequences (see Methods), we  
203 observed 19 of those significantly enriched at APOBEC2 regions in at least one  
204 differentiation time point. SP and KLF motifs were among the top enrichments observed (Fig.  
205 2E), suggesting a co-regulatory role between these factors and APOBEC2. In general, TF  
206 specificity groups increase their significance between 14 and 34 hours but with lower overall  
207 effect sizes or only at the later time points, suggesting that the interplay between TFs and  
208 APOBEC2 occupied regions is specific at 14 hours but broader at later time points, likely as  
209 consequence of events related to its early binding. Additionally, we did not observe  
210 APOBEC2 related DNA mutation at the occupied peaks, indicating that APOBEC2 is not a  
211 DNA mutator like other AID/APOBEC family members (Supplementary Fig. 3).

### 212 ***APOBEC2 represses expression of occupied genes***

213  
214 Focusing on the promoter bound genes we determined that there are ~1500 genes  
215 that are bound by APOBEC2 near their transcription start sites in any of the time points, 590  
216 of which are occupied at both time points (Fig. 3A). Overall, about 79% of the genes that are  
217 bound by APOBEC2 in the 14-hour time point remain bound at the 34-hour time point.  
218 Further, using Gene Set Enrichment Analysis to determine the distribution of APOBEC2  
219 occupied genes at both time points in a list of ranked expression changes either through  
220 differentiation (day 0 to 2) or upon APOBEC2 knockdown (A2 shRNA vs GFP shRNA at day  
221 2). Our results show that APOBEC2 occupied genes are significantly enriched at genes  
222 downregulated through differentiation (Fig. 3B). Moreover, upon APOBEC2 knockdown,  
223 APOBEC2 occupied genes are instead enriched at upregulated genes (Fig. 3C).  
224 Interestingly, overall expression of APOBEC2 bound genes through C2C12 differentiation  
225 from day 0 to 2 is significantly decreased during differentiation compared to genome wide  
226 expression changes (-0.3 versus 0.1 mean log<sub>2</sub> fold changes;  $t = -8.2$ ; adjusted P-values <  
227 0.0001; Fig. 3D). Furthermore, expression of APOBEC2 occupied genes increase upon  
228 APOBEC2 knockdown ( $t$ -statistic = 4.0; adjusted P-value < 0.001) highlighting a global  
229 repressive role of APOBEC2 during differentiation. Altogether, these results suggest that the  
230 observed transcriptional changes linked to APOBEC2 deficiency are due to APOBEC2  
231 functioning as a transcriptional repressor.  
232

233  
234 To validate its possible role as a transcriptional repressor, we selected candidate  
235 genes repressed by APOBEC2 occupancy. We narrowed it down to a list of genes occupied



236 by APOBEC2 which are downregulated during differentiation (day 2) and upregulated with  
237 APOBEC2 knockdown. In this gene list, we did not find an overrepresentation of GO terms  
238 relating to muscle differentiation; but rather, we found terms related to development of other  
239 lineages (Supplementary Table S1) similar to the non-muscle genes upregulated with  
240 APOBEC2 deficiency. Furthermore, a list of 31 genes related to differentiation (GO: 0045595  
241 regulation of differentiation) in other tissue contexts were upregulated with APOBEC2 loss  
242 (Fig. 3E). We speculate that APOBEC2 is acting as a repressor to direct C2C12  
243 differentiation into the muscle-lineage by repressing specious gene networks related to other  
244 lineages.

### 245 246 ***APOBEC2 binds directly to single- and double-stranded DNA*** 247

248 Thus far, the results suggest that APOBEC2 has a molecular role unique to the  
249 AID/APOBEC family. While it does not have the capacity to modify nucleic acids (RNA or  
250 DNA) through deamination<sup>30,31</sup>, it is capable of binding chromatin to regulate transcription.  
251 This implies either that APOBEC2 interacts directly with DNA at promoter regions, or that it  
252 interacts with transcription regulators that do so, or both.

253  
254 To assess whether APOBEC2 is capable of binding DNA directly, we generated  
255 recombinant APOBEC2 (expressed in insect cells, Supplementary Fig. 4A) and tested it in  
256 vitro for its capacity to bind DNA oligonucleotides that represent APOBEC2 bound  
257 sequences in vivo. We tested an SP/KLF DNA motif as it was highly represented in the  
258 ChIP-Seq data (Figure 4A). As a negative control, we tested an A-tract motif that based on  
259 the ChIP-Seq was not bound by APOBEC2 but which occurred frequently at promoters of  
260 differentially regulated genes. Using microscale thermophoresis (MST), purified APOBEC2  
261 bound both single-stranded and double-stranded DNA containing the SP/KLF motif with  
262 reasonable affinity (calculated  $K_d = 253 \pm 86$  nM and  $709 \pm 186$  nM, respectively, Figure 4A,  
263 S4B). In contrast, measurements for the A-tract motif showed large variances between trials,  
264 indicating lack of specific binding (Figure S4C). This ability to selectively bind both ssDNA  
265 and dsDNA in a sequence-specific manner in vitro (Fig. 4A) and in vivo (Fig. 2E) makes  
266 APOBEC2 unique among AID/APOBEC family members. These results demonstrate that  
267 APOBEC2 can target specific genes at promoter regions, and through this binding repress  
268 transcription.

269  
270 Using gel electromobility shift assays (EMSA), we checked for APOBEC2  
271 cooperativity with the transcription factor SP1 on its cognate motif. As expected, purified SP1  
272 protein alone shifted dsDNA with the SP/KLF motif (lane 7, Fig. 4B). Unexpectedly, we were  
273 unable to see a shift by APOBEC2 alone on either ssDNA or dsDNA unlike with MST (lanes

274 3 and 6, Fig. 4B). This could be due to the running conditions which were unable to preserve  
275 the presumably weaker intermolecular affinity. However, APOBEC2 together with SP1  
276 produced a shift with stronger intensity indicating cooperativity between the two DNA binding  
277 proteins (lane 7 vs lane 8, Fig. 4B). Interestingly, the two do not interact directly  
278 (Supplementary Fig. 4D), suggesting that the enhanced SP1 binding is mediated through  
279 DNA – possibly through changes in DNA conformation given that APOBEC2 has no  
280 detectable deaminase activity. This cooperativity suggests a molecular mechanism wherein  
281 APOBEC2 alters transcription factor affinity for specific motifs leading to transcriptional  
282 repression.

### 283 ***APOBEC2 interacts with corepressor complexes in vivo***

284  
285 To ascertain the mechanism of action for the observed transcriptional repression, we  
286 used proximity-dependent protein biotinylation (BioID) to confirm and identify other putative  
287 APOBEC2 proximal protein complexes that may indicate direct interactions. After statistical  
288 curation we identified 124 proteins that were significantly more tagged by APOBEC2-BirA  
289 and/or BirA-APOBEC2 than GFP-BirA controls in C2C12 cells (Supplementary Table S2).  
290 Functional annotation showed that many APOBEC2 neighboring proteins are related to cell  
291 membrane and cytoskeleton organization processes, in line with its high cytoplasmic  
292 abundance (Fig. 2B), but terms related to chromatin modification and histone deacetylation  
293 were also enriched (Supplementary Fig. 5A and Supplementary Table S3). Of special  
294 interest was the identification the histone deacetylase 1 (HDAC1) and Chromodomain-  
295 helicase-DNA-binding protein 4 (CHD4), both components of the nucleosome remodeling  
296 and histone deacetylation (NuRD) transcriptional corepressor complex <sup>32</sup>, (Fig. 4C and  
297 Supplementary Fig. 5B). Using co-IP, we validated that APOBEC2 interacts with HDAC1 in  
298 differentiated C2C12 myoblasts (Fig. 4D). Together with the observation that APOBEC2  
299 interacts directly with chromatin, this suggests that APOBEC2 plays a role in gene regulation  
300 through epigenetic nucleosome modification with these transcriptional corepressor  
301 complexes.  
302

303  
304 Taken together, our results suggest a direct role of APOBEC2 in repressing specific  
305 transcribed genes, likely mediated by an HDAC1 co-repressor complex during C2C12  
306 myoblast differentiation (Fig. 4F).

### 307 **DISCUSSION**

308  
309 There have been many hypothesized roles for the cytidine deaminase APOBEC2.  
310 Here we show that the expression of APOBEC2 during myoblast differentiation has  
311 consequential effects on myotube formation owing to at least one unexpected molecular  
312



313 function: transcriptional control. We discovered that APOBEC2 loss, leads to faulty myoblast  
314 differentiation and concomitant gene expression changes. We show that these gene  
315 expression changes come about through direct chromatin interaction of APOBEC2 at  
316 promoters – with no observed APOBEC2 related changes in RNA editing, DNA methylation,  
317 or DNA mutation. We find instead that APOBEC2 is capable of directly binding DNA and  
318 interacting with corepressor complexes. Indeed, through this interaction, APOBEC2  
319 specifically represses transcriptional programs unrelated to muscle differentiation thus  
320 indirectly supporting proper muscle differentiation.

321

322 The deaminase domain of APOBEC2 appears to have lost catalytic activity <sup>30,31</sup>.  
323 However, it seems to have retained its ability to bind nucleic acids. Binding ssDNA is nothing  
324 new to members of the AID/APOBEC family <sup>33</sup>. However, the demonstration that APOBEC2  
325 directly binds to dsDNA is groundbreaking for the family. There has been evidence for  
326 APOBEC3-driven dsDNA mutation but no evidence for direct dsDNA binding; instead, the  
327 mutational mechanism is likely through ssDNA <sup>34,35</sup>. Prior work has linked APOBEC2  
328 overexpression to RNA editing of specific transcripts as observed in the healthy livers of  
329 transgenic mice which eventually develop hepatocellular carcinoma <sup>14</sup>. Notably, RNA editing  
330 was only detectable in the liver at specific transcripts for the transgenic mice. However,  
331 based on our transcriptome analysis, we were unable to find evidence of such RNA editing  
332 in our myoblast differentiation models. Prior work has also reported mild effects of  
333 APOBEC2 on DNA methylation specifically at the MYOG promoter <sup>18</sup>; yet from our ChIP-Seq  
334 data, we do not find occupancy at the MYOG gene. Furthermore, there is conflicting data on  
335 the role of the AID/APOBEC family in active DNA demethylation; and, APOBEC2 dependent  
336 demethylation has not been found in other cellular contexts <sup>36,37</sup>. A role in transcriptional  
337 repression such as we propose, would also explain these prior data, as indirect effects of  
338 improper differentiation.

339

340 Previous studies suggested that recombinant APOBEC2 is incapable of binding DNA  
341 or deaminating it <sup>16,30,31</sup>. Our experiments using recombinant protein produced in eukaryotic  
342 cells show that APOBEC2 is capable of binding DNA with reasonable affinity, and when it  
343 does so, it alters the ability of proximal transcription factors (such as SP1) to interact with  
344 their cognate motifs. Similar findings have also been observed with the transcription factor  
345 POU6F2, suggesting but not proving a role for APOBEC2 in transcription <sup>16</sup>.

346

347 Furthermore, our proximity ligation experiments reveal that APOBEC2 protein directly  
348 interacts with HDAC1 and CHD4 containing repressor complexes providing a direct  
349 epigenetic mechanism for the repression of APOBEC2 occupied genes. HDAC1 and CHD4

350 are components of the NuRD corepressor complex, whose involvement has already been  
351 proposed in skeletal or myocardial muscle fate determination<sup>38</sup>. Additionally, the abundance  
352 of APOBEC2 in the cytoplasm and its proximity to proteins that participate in cell morphology  
353 and the cytoskeleton could either reflect a mechanism limiting APOBEC2 access to the  
354 nucleus, or perhaps an additional function that remains to be studied.

355

356 Uniquely amongst AID/APOBEC family members, the amino-terminus of APOBEC2  
357 contains a region that is glutamate-rich and intrinsically disordered<sup>20</sup>. Loss of this  
358 unstructured domain results in inability of the protein to rescue the knockdown phenotype  
359 likely through the loss of its nuclear retention. Proteins with similar disordered regions have  
360 been shown to form liquid phase separated membrane-less compartments and this function  
361 appears to be especially important for transcriptional regulation as transcription factors with  
362 disordered regions have been shown to form such compartments<sup>39</sup>. Even though, no  
363 enzymatic activity has been detected for APOBEC2, potential substrates could be present in  
364 these chromatin compartments: transient RNA species, eluding detection limits by our RNA-  
365 Seq method, or, potentially, ssDNA structures at melted promoters. We propose that through  
366 its N-terminal unstructured region APOBEC2 is retained in the nucleus where on one hand it  
367 binds DNA at promoter regions in a sequence specific fashion, and on the other, it recruits  
368 corepressor complexes to repress transcription.

369

370 We hypothesize that APOBEC2 acts as a modulator of its bound promoters during  
371 the myogenic program – fine-tuning it for muscle differentiation and repressing other lineage  
372 programs. MYOD1 has been shown to bind and activate lineage programs outside the  
373 muscle lineage; however, this is mitigated by corepressors<sup>40</sup>. Furthermore, as APOBEC2  
374 expression under healthy conditions is mostly confined to muscle tissue (both skeletal and  
375 heart), where it might be acting as a ‘many-but-muscle’ lineage repressor – similar to MYT1L  
376 in neuronal differentiation<sup>41</sup>.

377

378 The discovery that APOBEC2 has a direct role in transcriptional control impacts how  
379 we interpret the phenotypes that have been attributed to it in the mouse knockout models  
380 and other biological systems, well beyond muscle differentiation – for example zebrafish  
381 retina and optic nerve regeneration, *Xenopus* embryo development, and cancer  
382 development<sup>12–14</sup>. In the zebrafish models, APOBEC2 loss leads to similar defective muscle  
383 phenotypes but it is deemed essential in the retinal regeneration model – where cellular  
384 reprogramming is a key step<sup>12</sup>. Directly or indirectly, these prior observations likely relate to  
385 aberrant transcriptional programs, normally silenced in the context of tissue development or  
386 cell differentiation due to APOBEC2 transcriptional control. Taken together, we postulate that

387 APOBEC2 is a transcriptional repressor that modulates transcriptional programs during cell  
388 differentiation or reprogramming.

## 389 **Methods**

### 391 *Data availability*

392 High throughput sequencing datasets are all found in: GSE117732 and more specifically:  
393 RNA-Seq (GSE117730); ChIP-Seq (GSE117729); ERRBS (GSE117731). Mass  
394 spectrometry data for BioID performed in Flp-In 293 T-REx cells have been deposited in  
395 MassIVE under ID.

### 398 *C2C12 cell culture*

399 C2C12 cells (CRL-1772, ATCC) were maintained in DMEM (30-2002, ATCC) with 10% fetal  
400 bovine serum and fed every two days. To differentiate equal number of cells ( $2.5 \times 10^5$ )  
401 were seeded in 6-well plates followed by media change to DMEM with 2% horse serum after  
402 12 hours. For generating single cell clones for RNA-Seq and RRBS experiments C2C12s  
403 were sorted using fluorescence-activated cell sorting (FACS) and seeded into a 96 well  
404 plate. Each clone was expanded and tested for successful knockdown through  
405 immunoblotting.

### 408 *APOBEC2 knockdown and overexpression*

409 C2C12 cells were infected with lentiviruses carrying shRNA, targeting either APOBEC2 or  
410 GFP. All APOBEC2 shRNAs were obtained from The Broad Institute's Mission TRC-1  
411 mouse library and present in pLKO.1-puro construct. Plasmids used: pLKO.1 - TRC cloning  
412 vector (Addgene, # 10878)<sup>42</sup>; pLKO.1 puro GFP siRNA (Addgene, # 12273)<sup>43</sup>. The design  
413 of shRNAs and cloning in pLKO.1-TRC, were done according to the Addgene protocol  
414 (Protocol Version 1.0. December 2006). The following shRNAs sequences were used for  
415 APOBEC2 knockdown: A2 shRNA: GCTACCAGTCAACTTCTTCAA; GFP shRNA:  
416 GCAAGCTGACCCTGAAGTTCAT.

417 Virions were produced by co-transfection of pLKO.1-puro shRNA containing construct,  
418 packaging plasmid psPAX2 (Addgene, #12260) and envelope plasmid pMD2.g (Addgene,  
419 #12259) in 293T cells (CRL-3216, ATCC). Transfections were done using Lipofectamine  
420 2000 Reagent (Invitrogen) as per manufacturer instructions. Supernatants with lentiviral  
421 particles were collected at 24 and 48 hours after transfection, passed through a 0.45 mm  
422 filter and applied to C2C12s. For APOBEC2 constitutive knockdown, C2C12 cells were  
423 infected with pLKO.1 containing lentiviruses in growth media containing 8  $\mu\text{g}/\text{mL}$  polybrene  
424 for 12 hours. Two days after lentiviral infection cells were cultured with 4  $\mu\text{g}/\text{ml}$  puromycin  
425 containing media for two more days to select cells stably expressing the shRNA.

426 Rescue constructs, mouse APOBEC2 and del(1-41)APOBEC2 with silent mutations to  
427 escape shRNA knockdown, and tagged constructs, APOBEC2 and del(1-41)APOBEC2 with  
428 C-terminal 3xHA-tags, were cloned into pMXs-GFP/Puro retroviral vectors (Cell Biolabs,  
429 Inc.). Virions were produced in 293T cells by co-transfection with pMXs construct and pCL-  
430 Eco (Novus Biologicals) using Lipofectamine 2000.

### 436 *Immunoblotting and co-immunoprecipitation*

437 For immunoblotting experiments, C2C12 cells were first washed with cold PBS and lysed in  
438 100  $\mu\text{l}$  RIPA lysis buffer (Santa Cruz, sc-24948) in 6-well plates. They were incubated at 4°C  
439

441 for 15 minutes and then extracts were scrapped into a microfuge tube. Lysates were snap  
442 frozen in liquid nitrogen. After thawing the lysates on ice and clearing out cell debris by  
443 centrifugation, equal amounts of total protein (ranges between 10-30  $\mu\text{g}$ ) were boiled in  
444 SDS-PAGE sample buffer and loaded onto each lane of a polyacrylamide gel (Criterion XT  
445 Bis-Tris Gel 12%, Bio-Rad). Following electrophoresis, the resolved protein was transferred  
446 to a nitrocellulose membrane and subjected to western blot analysis. The source and dilution  
447 for each antibody used were: polyclonal rabbit-APOBEC2 (gift from Alin Vonica MD, PhD),  
448 1:1000; monoclonal mouse-APOBEC2 (clone 15E11, homemade), 1:5000; TroponinT clone  
449 JLT- 12 (T6277, Sigma-Aldrich), 1:500; alpha-tubulin DM1A (Abcam, ab7291), 1:5000;  
450 MyHC MF-20 (DSHB), 1:20; rabbit anti-SP1 (Merck, 07-645), 1:1000; and rabbit anti-HDAC1  
451 antibody (ab7028), 1:2000.

452  
453 For co-immunoprecipitation experiments,  $4 \times 10^6$  C2C12 cells were plated and lysed after 4  
454 days in differentiation medium. Cells were trypsinized, washed with cold PBS, and lysed in 1  
455 mL cell lysis buffer: 0.5% Tween 20, 50 mM Tris pH 7.5, 2 mM EDTA, and freshly added 1X  
456 Halt protease and phosphatase inhibitor cocktail EDTA-free (Thermo, 78441). Mixture was  
457 vortexed and incubated on ice for 10 min, twice. Nuclei were separated from the cytoplasmic  
458 fraction by centrifugation (6000 g, 1 minute, 4°C). Nuclei were washed with 1 mL cold PBS  
459 before lysing in 250  $\mu\text{L}$  high salt nuclear lysis buffer: 800 mM NaCl, 1% NP40 (Igepal CA-  
460 640), 50 mM Tris pH 7.5, and freshly added 1X protease and phosphatase inhibitor cocktail,  
461 EDTA-free. Mixture was vortexed and incubated on ice for 10 min, twice. Nuclear lysate was  
462 then diluted to a final salt and detergent concentration of 400 mM NaCl and 0.5% NP40  
463 using 250  $\mu\text{L}$  dilution buffer: 50 mM Tris pH 7.5 and 1X protease and phosphatase inhibitor  
464 cocktail, EDTA-free. Nuclear lysates were treated with Benzonase (Merck-Millipore, 70664).  
465 Nuclear lysates were pre-cleared on 25  $\mu\text{L}$  Dynabeads M-280 Sheep anti-mouse or anti-  
466 rabbit IgG (Thermo, 11201D/12203D), depending on primary IgG antibody. Pre-cleared  
467 nuclear lysate was then added to 50  $\mu\text{L}$  beads conjugated with 2-4  $\mu\text{g}$  primary IgG antibody:  
468 rabbit anti-APOBEC2 (Sigma, HPA017957) or rabbit IgG isotype control.  
469 Immunoprecipitation was done overnight at 4°C with rotation. Beads were thoroughly washed  
470 before resuspending and boiling in SDS-PAGE sample buffer.

471  
472 *Immunofluorescence staining and fusion index of C2C12 cells*

473  
474 C2C12 cells ( $5 \times 10^4$  cells) were seeded in collagen-coated coverslips (BD Biosciences,  
475 356450) in 12- well plate the day before inducing of differentiation with 2% horse serum.  
476 They were washed with cold PBS and fixed with paraformaldehyde (4%) in PBS for 10  
477 minutes at 4 °C. This was followed by 2 washes, 5 minutes each at room temperature and  
478 blocking solution (0.5% BSA, 1% gelatin, 5% normal goat serum, 0.1% Triton) in PBS for 1  
479 hour at room temperature. This was followed by overnight stain with antibodies in a  
480 humidified chamber at 4°C, three washes with cold PBS 5 min each at room temperature.  
481 Coverslips were then incubated with secondary antibodies for 1 hour at room temperature,  
482 followed by three washes with PBS 5 min at room temperature. Immunofluorescence  
483 staining of C2C12 cells was carried out with primary antibodies: MyHC MF20 (DSHB) and  
484 FLAG M2 (Sigma, F1804). Nuclei were counterstained and coverslips were mounted with  
485 VECTASHIELD Antifade Mounting Medium with DAPI (Vector Laboratories, H-1200).  
486 Images were taken using confocal Leica TCS SP5 II or widefield Zeiss Cell Observer and  
487 image analysis was done with Fiji/ImageJ.

488  
489 *Chromatin salt-extraction profiling*

490  
491 C2C12 cells were seeded in equal numbers ( $2 \times 10^6$  cells) and induced to differentiate after  
492 12 hours. Five days after differentiation they were lysed in the plate with 100  $\mu\text{l}$  sucrose lysis  
493 buffer (320 mM sucrose, 0.5% NP-40, 10 mM Tris pH 8.0, 3 mM  $\text{CaCl}_2$ , 2 mM Mg acetate,  
494 0.1 mM EDTA). Extracts were incubated for 5 minutes on ice and spun at 500 g for 5  
495 minutes to collect the nuclear pellet and supernatant as the cytosol fraction. Nuclear pellets

496 were washed with no-salt Nuclei Buffer (50 mM Tris pH 8, 1% NP-40, 10% glycerol).  
497 Following the washes the nuclear proteins were extracted at increasing concentrations of  
498 NaCl from 250 mM up to 2 M in Nuclei Buffer during which they are homogenized using  
499 dounce tissue grinders (Fisher, K8853000000), incubated on ice for 10 minutes and spun at  
500 4°C for 10 additional minutes. Eluted material was collected, resolved on polyacrylamide gel  
501 electrophoresis (Criterion XT Bis-Tris Gel 12%, Bio- Rad) and immunoblotted with specific  
502 antibodies: Histone H4 (Merck, 05-858R), 1:5000; monoclonal mouse-APOBEC2 (clone  
503 15E11, homemade), 1:5000;  $\alpha$ -tubulin DM1A (Abcam, ab7291), 1:5000.

504

#### 505 *RNA expression analysis*

506

507 Library preparation and sequencing were done by Rockefeller University Genomics  
508 Resource Center [<https://www.rockefeller.edu/genomics/>] using TruSeq Stranded mRNA  
509 Sample Prep kit as per manufacturer's instruction. The procedure includes purification of  
510 poly-adenylated RNAs. Libraries were sequenced with 50bp paired-read sequencing on the  
511 HiSeq2500 (Illumina). Paired end read alignments and gene expression analysis were  
512 performed with the Bioinformatics Resource Center at Rockefeller University. Paired-end  
513 reads were aligned to mm10 genome using the subunc function in the Bioconductor  
514 Rsubread<sup>44</sup> package and bigWig files for visualization were generated from aligned reads  
515 using the Bioconductor rtracklayer<sup>45</sup> and GenomicAlignments packages<sup>46</sup>. For analysis of  
516 differential expression, transcript quantifications were performed using Salmon<sup>47</sup> in quasi-  
517 mapping mode. Gene expression values were calculated from transcript quantifications  
518 using tximport<sup>48</sup>. Gene expression changes were identified at a cut off of 5% FDR  
519 (benjamini-hockberg correction) using the Wald test implemented in DESeq2<sup>49</sup>. Annotation  
520 files used: BSgenome.Mmusculus.UCSC.mm10(v1.4.0);org.Mm.db(v3.5.0);  
521 TxDb.Mmusculus.UCSC.mm10.knownGene.gtf.gz(v3.4.0)

522

#### 523 *RNA editing analysis*

524

525 RNA editing analysis was performed as previously reported elsewhere<sup>22</sup>. Editing detection  
526 was performed by comparing C2C12 control samples (GFPsh) to APOBEC2 knockdown  
527 samples using RNA-Seq datasets in triplicates for each sample. Minimum filters include  
528 quality control thresholds (minimum of five reads covering the putative site with at least two  
529 reads supporting the editing event; filtering of reads that contain indels or support an edit in  
530 the first or last two base pairs of a read). Stringent filters applied to the APOBEC1  
531 dependent C-to-U edited sites include all of the above and additionally the magnitude of the  
532 control vector was at least 15 and the angle between the wild-type and knockout vectors was  
533 at least 0.11 radians, as described in the paper referenced in this section.

534

#### 535 *Enhanced reduced representation bisulfite sequencing (ERRBS)*

536

537 ERRBS library preparation, sequencing and read alignment was performed by the  
538 Epigenomics Core Facility of Weill Cornell Medicine [[epicore.med.cornell.edu/](http://epicore.med.cornell.edu/)] as previously  
539 described<sup>50,51</sup>. The procedure includes bisulfite conversion of the DNA. Libraries were  
540 sequenced with 50bp single reads (SR) in HiSeq2500 (Illumina). Reads were aligned to a  
541 bisulfite converted reference mouse genome with Bismark<sup>52</sup>. The methylation context for  
542 each cytosine was determined with scripts from the core facility.

543

544 Here coverage of specific genomic regions by ERRBS dataset, refers to the percent of  
545 features (eg percent of promoters, CpG islands) that contain at least one CpG that is well  
546 covered (> 10x). For gene specific annotations the mm10 UCSC knownGene annotations  
547 from the UCSC table browser were used and for CpG islands the mm10 cpGIslandExt track  
548 of the UCSC table browser. Genomic features were defined as: CpG islands, CpG island  
549 shores were defined as 2kb upstream and downstream of a CpG island; Gene promoters



550 (region 2kb upstream and 2kb downstream of the TSS), exons, introns and intergenic  
551 regions.

552

### 553 *Differential methylation analysis*

554

555 MethylKit (v1.3.8)<sup>53</sup> was used to identify differentially methylated cytosines (DMCs) with q-  
556 value less than 0.01 and methylation percentage difference of at least 25% after filtering  
557 ERRBS dataset by coverage, normalizing by median and including CpG sites that are  
558 covered >10x, in 3 out of 5 biological replicates (lo.count = 10, lo.perc = NULL, hi.count =  
559 1000, hi.perc = 99.9), (destrand=TRUE,min.per.group=3L). eDMRs (v0.6.4.1)<sup>54</sup> was used to  
560 empirically determine differentially methylated regions, using the DMCs identified with  
561 methylKit. In order for a region to be defined as a DMR, default parameters (num.DMCs=1,  
562 num.CpGs=3, DMR.methdiff=20) of eDMR were used, so that each region has: (1) at least 1  
563 DMC in the region, as determined using methylKit, (2) at least 3 CpGs included in the region  
564 and (3) absolute mean methylation difference greater than 20%. For a region to be defined  
565 as a significant DMR, default parameters were used (DMR.qvalue = 0.001, mean.meth.diff =  
566 20, num.CpGs = 5, num.DMCs = 3) so that each significant DMRs has (1) 5 CpGs where at  
567 least 3 of them are significant DMCs as determined by methylKit (2) have a minimum 20%  
568 methylation change for the region.

569

### 570 *Chromatin immunoprecipitation method*

571

572 C2C12s were plated at ~70% confluence 12 hours prior to inducing differentiation (seed  
573 ~2x10<sup>6</sup> cells) maintained in DMEM (ATCC, 30-2002) with 10%FBS. This was followed by  
574 media change to DMEM with 2% horse serum (Life Biotechnologies, 26050-088) to induce  
575 differentiation. The cells (~5x10<sup>6</sup> /10cm plate) were harvested at 24-hour or 34-hour after  
576 inducing differentiation. They were fixed on plate with 1% PFA in PBS for 10 minutes at RT.  
577 Glycine was added to a final concentration of 125mM. Cells were washed 2 times with 1x  
578 PBS with protease inhibitor cocktail (Roche, 11836170001). They were lysed on the plate  
579 with cold Farnham lysis buffer to ~10x10<sup>6</sup> cells /mL (5mM PIPES pH 8.0, 0.5% NP-40,  
580 85mM KCl, 1mM EDTA, PIC) and incubated rotating for 15min at 4°C . Lysates were scraped  
581 off the plates, pelleted and resuspended in LB2 (10 mM Tris pH 8.0, 200 mM NaCl, 1 mM  
582 EDTA, 0.5 mM EGTA, PIC) and incubated rotating for 15 minutes at 4°C and then  
583 centrifuged. Pellets were resuspended to 5x10<sup>7</sup> cells/mL in LB3 (10 mM Tris pH 8.0, 100  
584 mM NaCl, 1 mM EDTA, 0.5 mM EGTA, 0.1% sodium-deoxycholate, 0.5% sodium lauroyl  
585 sarcosinate, PIC) until suspension was homogenized. Samples were then sonicated using  
586 Covaris ultrasonicator model S220 for 15 minutes with the following settings: 140W peak  
587 power, 5% duty, 200 cycles per burst. TritonX-100 to a final concentration of 1% was added  
588 to the samples. Samples were clarified by centrifugation at 20,000 g for 10 minutes at 4°C.  
589 The supernatant is the soluble chromatin extract. The soluble fragmented chromatin from  
590 ~2.5x10<sup>7</sup> was used for each IP. For each IP 100ul Dynabeads (ThermoFisher anti-rabbit  
591 M280, 11203D) were mixed with 10ul polyclonal rabbit-APOBEC2 antibodies (gift from Alin  
592 Vonica MD, PhD) incubating overnight (~16 hours). A magnetic stand was used to separate  
593 beads from the lysate and beads were washed one time each with for 5min in: low salt wash  
594 (0.1%SDS, 1%Triton X-100, 2 mM EDTA, 20 mM Tris pH8, 150 mM NaCl, PIC), high salt  
595 wash (0.1%SDS, 1% Triton X- 100, 2mM EDTA, 20mM Tris pH8, 500mM NaCl, PIC), lithium  
596 chloride wash (150mM LiCl, 1% NP-40, 1% NaDOC, 1mM EDTA, 10mM TrispH8, PIC), TE  
597 wash (10mM Tris-HCl pH8, 1mM EDTA, 50mM NaCl, PIC). Beads were resuspended in 52  
598 ul of elution buffer (50mM Tris-HCl pH8, 10mM EDTA, 1%SDS) and incubated at 30min at  
599 65°C while shaking to prevent beads from settling. The eluate was transferred to a new tube,  
600 inputs of the same volume were incubated for 8 hours at 65°C to reverse the crosslink. The  
601 samples were treated with RNase (Roche, 11119915001) for 1 hour at 37°C, and with  
602 Proteinase K for 2 hours at 55°C. Fragmented DNA was purified with Ampure beads  
603 (Agencourt AMPure XP beads A63881) as per the manufacturer's instructions.

604



## 605 *Chromatin immunoprecipitation sequencing and analysis*

606

607 The ChIP-Seq included biological triplicates for each group. ChIP-Seq libraries were  
608 prepared using NEBNext Ultra DNA Library Prep Kit as per manufacturer's instructions.  
609 Libraries were sequenced with 75 base pair single read sequencing on the NextSeq 500  
610 (Illumina). Read alignments and initial analysis were performed with the Bioinformatics  
611 Resource Center at Rockefeller University. Single-end reads were aligned to mm10 genome  
612 using the subread function in the Bioconductor Rsubread<sup>44</sup> package and bigWig files for  
613 visualization were generated from aligned reads using the Bioconductor rtracklayer<sup>45</sup> and  
614 GenomicAlignments packages<sup>46</sup>. Quality metrics for the ChIP-Seq data were assessed  
615 using ChIPQC bioconductor package<sup>55</sup>, according to Encyclopedia of DNA Elements  
616 (ENCODE) working standards and guidelines for ChIP experiments<sup>56</sup>. Reads mapping to  
617 more than one genomic location were filtered prior to peak calling using Model-based  
618 Analysis of ChIP-Seq (MACS2)<sup>57,58</sup> with duplicate filtering applied and input DNA sample as  
619 a control. Peaks that are reproducible (present in 2 out of 3) were filtered for known artifact  
620 or blacklisted regions (The ENCODE Project Consortium, 2012). For each of the peaks a  
621 weighted mean location of peak summits cross biological replicates is calculated<sup>59</sup>. The list  
622 of binding regions 100 base pairs around the mean peak summits was used for downstream  
623 analysis. Ngs.plot (v2.61) was used with specific parameters (-G mm10 -D refseq -C -L 1000  
624 -FL 150 -P 4 -SC 0,1 -GO none -RB 0.05) to generate average profiles of ChIP-Seq reads  
625 (Shen et al., 2014). ChIPSeeker (v1.14.2)<sup>60</sup> and ChIPpeakAnno (3.12.7)<sup>61,62</sup> were used for  
626 downstream analysis after peak calling for annotation of the binding regions to the nearest  
627 gene. We created an APOBEC2 occupied gene set, using genes that show consistent  
628 APOBEC2 occupancy at both 14-hour and 34-hour time points. GSEA (v3.0)<sup>63</sup> was used for  
629 testing the enrichment of the APOBEC2 occupied gene set in the list of genes that are  
630 differentially expressed. Annotation files used: BSgenome.Mmusculus.UCSC.mm10 (v1.4.0)  
631 org.Mm.db (v3.5.0) and TxDb.Mmusculus.UCSC.mm10.knownGene.gtf(v3.4.0).

632

## 633 *Gene list analysis*

634

635 Gene list analyses either by statistical overrepresentation test or statistical enrichment test  
636 were done through PANTHER<sup>64</sup>. Briefly, gene lists were filtered based on expression  
637 ( $\log_2$ FoldChange, up- or downregulated at specific treatment and time point) and p-adj  
638 values (FDR < 10%) and used as input in PANTHER gene list analysis. For statistical  
639 overrepresentation tests of upregulated genes with A2 vs GFP shRNA, genes were filtered  
640 based on  $\log_2$ FoldChange > 0.58 and FDR < 10% at each time point and used as input list  
641 with Mus musculus (all genes in database) as reference/background list. Default parameters  
642 were followed for the analyses and are indicated in the corresponding output. For

643

## 644 *Prediction of binding motifs*

645

646 Transcription factor motifs associated to 108 TF modules<sup>29</sup> were mapped against time-point  
647 specific sequences harboring APOBEC2, 200 base pairs centered on peak summits. For  
648 each time point, we defined a background set of negative sequences using scrambled  
649 regions of the positive sequences. Using both sequence sets of positives and negatives, we  
650 assessed the presence of strong 8-mers associated to each of those 108 families and their  
651 ability to classify between APOBEC2 regions and negative sequences, summarizing a  
652 Receiver-Operating Characteristic Area Under the Curve (ROC-AUC) for each of those.  
653 Assessment of significance in each case was done using a Wilcoxon rank sums test (one  
654 sided). P-values were corrected through a Benjamini-Hochberg procedure.

655

## 656 *Enrichment of ChIP-seq peaks on APOBEC2 differentially expressed target genes*

657

658 Using the ChIP-Atlas as a reference, we downloaded all datasets associated to myoblast or  
659 C2C12 cells (N=54). For each dataset, we intersected ChIP-seq peaks from APOBEC2 in

660 each timepoint and replicate (command *fisher* in *bedtools*), obtaining a 2 x 2 contingency  
661 matrix. The number of overlaps was linked to the closest gene using 2000bp with respect to  
662 TSS annotations in the mouse genome. The proportion of genes associated to a differential  
663 expression comparison was done by dividing the number of APOBEC2 peaks proximal to a  
664 DE-gene with a peak from a ChIP-Atlas dataset by the total number of DE-genes in that  
665 comparison. This was repeated for each gene expression contrast. Mean log<sub>2</sub> fold change  
666 estimates for each ChIP-Atlas peak dataset were obtained by calculating the distribution of  
667 log<sub>2</sub> fold changes between non-target DE-genes and target DE-genes, in each time point,  
668 using the three APOBEC2 ChIP-seq replicates. With those, we calculated a global mean and  
669 standard deviation across all ChIP-Atlas factors, reporting a Z-score for dataset, time point  
670 and differentially expression comparison between APOBEC2 target and non-target genes.

671

#### 672 *BioID samples preparation*

673

674 Constructs encoding mouse APOBEC2 fused to BirA-Flag by the N- and C-terminus were  
675 cloned into pMX-puro. Both constructs, as well as the eGFP-BirA-Flag control, were modified  
676 to encode a weak Kozak sequence (TATTGTATG) to reduce protein expression levels.  
677 Virions containing the pMX vectors were produced in the Plat-E packaging cell line<sup>65</sup>.  
678 C2C12 cells were spininfected with Plat-E supernatant, 8mg/ml polybrene (16,000 rpm, 90  
679 min, 30C) and selected with 4 µg/ml puromycin to obtain stable cell populations. Similar bait  
680 and control expression levels were confirmed by western blot, and localization of the  
681 APOBEC2 constructs analyzed by immunofluorescence. C2C12 cells expressing each  
682 construct were pre-cultured for 24 h with 2% low horse serum before supplementing the  
683 media to 50 µM biotin (BioBasic). Cells were harvested 24 h later, washed 3× with PBS, then  
684 lysed in 1.5 mL of RIPA buffer and sonicated 30 s at 30% amplitude (3 × 10 s bursts with a  
685 2 s break in between). Benzonase (250 U, Sigma) was added to the lysates during  
686 centrifugation, 30 min at 16,000 × g, 4 °C. Forty µL aliquots of supernatant were kept to  
687 monitor expression and biotinylation and run on western blot, and the remaining lysate was  
688 incubated with 70 µL of pre-washed streptavidin-sepharose beads (Sigma) for 3 h on a  
689 rotator at 4 °C. Beads were then washed with 1 mL of RIPA buffer, transferred to a new tube  
690 and washed again 2× with 1 mL of RIPA buffer and then 3× with 1 mL of 50 mM Ammonium  
691 Bicarbonate (ABC) (Biobasic). Beads were then resuspended in 100 µL of ABC with 1 µg of  
692 trypsin (Sigma) and incubated overnight at 37 °C with rotation. The following day, 1 µg of  
693 trypsin was added for a further 2 h digestion. Samples were centrifuged 1 min at 2000 RPM,  
694 and the supernatant was transferred to a new tube. Beads were rinsed twice with 100 µL of  
695 water, and all supernatants were pooled and adjusted to 5% formic acid. Samples were then  
696 centrifuged for 10 min at 16,000 × g for clarification. Trypsin-digested peptides in the  
697 supernatant were dried in a SpeedVac (Eppendorf) for 3 h at 30 °C. Samples were  
698 resuspended in 15 µL of 5% formic acid and kept at -80 °C for mass spectrometric analysis.

699

700

#### 701 *BioID MS Data analysis*

702

703 Mass spectrometry was performed at the IRCM proteomics platform. Samples were injected  
704 into Q Exactive Quadrupole Orbitrap (Thermo Fisher), and raw files were analyzed with the  
705 search engines Mascot and XTandem!<sup>66</sup> through the iProphet pipeline<sup>67</sup> integrated in  
706 Prohits<sup>68</sup>, using the mouse RefSeq database (version 73) supplemented with "common  
707 contaminants" from the Max Planck Institute (<http://maxquant.org/downloads.htm>), the  
708 Global Proteome Machine (GPM; <http://www.thegpm.org/crap/index.html>) and decoy  
709 sequences. The search parameters were set with trypsin specificity (two missed cleavage  
710 sites allowed), variable modifications involved Oxidation (M) and Deamidation (NQ). The  
711 mass tolerances for precursor and fragment ions were set to 15 ppm and 0.6 Da,  
712 respectively, and peptide charges of +2, +3, +4 were considered. Each search result was  
713 individually processed by PeptideProphet<sup>69</sup>, and peptides were assembled into proteins  
714 using parsimony rules first described in ProteinProphet<sup>70</sup> using the Trans-Proteomic

715 Pipeline (TPP). TPP settings were the following: -p 0.05 -x20 -PPM -d "DECOY", iprophet  
716 options: pPRIME and PeptideProphet: pP.

717

#### 718 *BioID interactions scoring*

719

720 Six biological replicates of each bait and paired eGFP controls were done in two  
721 independent experiments (3 replicates each) and combined for the analysis for maximal  
722 statistical power. The estimation of interactions scorings was performed for proteins with  
723 iProphet protein probability  $\geq 0.9$  and unique peptides  $\geq 2$ , by combining two algorithmic  
724 approaches : SAINTexpress<sup>71</sup> and DESeq<sup>72</sup>. The SAINTexpress (version 3.6.1) analysis  
725 was performed with default settings using no compression for controls or baits. Interactions  
726 displaying a BFDR  $\leq 0.01$  were considered statistically significant. We also used DESeq2  
727 (version 1.2.1335), an R package that applies negative binomial distribution to calculate  
728 enrichments over controls. DESeq was run using default settings and significant preys were  
729 selected by applying a  $\leq 0.1$  p-value cut-off. The combined list of significant preys obtained  
730 from DESeq and SAINT was defined as potential APOBEC2 proximity interactors.

731

#### 732 *BioID annotations and network analyses*

733

734 Graphical representations of protein networks were generated with Cytoscape<sup>73</sup> (version  
735 3.8.2). Prior to the importation of APOBEC2's network in Cytoscape, mouse to human  
736 orthologs were extracted from the Ensembl database with the BioMart export tool (Mouse  
737 genes version GRCm38.p6). Next, we extracted human prey-prey interactions from BioGrid  
738 release 4.2.192<sup>74</sup> and from Cytoscape's PSICQUIC built-in web service client (April 2021  
739 release) by searching against the IntAct database<sup>75</sup>. Once augmented, clusters were  
740 extracted with the Markov CLustering Algorithm (MCL) from Cytoscape's ClusterMaker2  
741 application (version 1.3.1)<sup>76</sup>. To identify relevant complexes among clusters, the APOBEC2  
742 interactome was annotated with the Gene Ontology Annotation database<sup>77</sup> (GOA version  
743 171) and CORUM (version 3.0)<sup>78</sup>, a database of known protein complexes.  
744 EnrichmentMaps<sup>79</sup> of GO Biological Processes were generated by importing g:Profiler's<sup>80</sup>  
745 generic enrichment file outputs and mouse GO BP GMT file. p-values  $\leq 0.05$  and q-value  $\leq$   
746 0.05 were set as node cutoffs, and Edge cutoff (similarity) were set at 0.345.

#### 747 *DNA editing detection*

748

749 We aligned all short reads from input and IP experiments to the mouse genome (GRCm38  
750 EnsEMBL 90) using HiSAT v2.1.0 with default settings. We removed all non-unique mappers  
751 and marked all read duplicates with picard.sam.markduplicates.MarkDuplicates (v 2.5.0). We  
752 compared all samples to the reference genome using JACUSA v1.2.4 in call-1 mode with  
753 program parameters: call-1 -s -c 5 -P UNSTRANDED -p 10 -W 1000000 -F 1024 --  
754 filterNM\_1 5 -T 1 -a D,M,Y -R. Diverging positions are reported if the LLR ratio exceeds 1.0.  
755 Briefly, read count distributions at every genomic position (coverage  $>5$ ) are contrasted with  
756 the expected read count based on the reference base. For the pairwise comparison of all  
757 input samples stratified by conditions, we used JACUSA v.1.2.4 in call-2 mode with program  
758 parameters: call-2 -s -c 5 -P UNSTRANDED,UNSTRANDED -p 10 -W 1000000 -F 1024 --  
759 filterNM\_1 5 --filterNM\_2 5 -T 1 -a D,M,Y -u DirMult:showAlpha -R. Briefly, read count  
760 comparison from replicate input samples are contrasted with one another: A2 shRNA  
761 knockdown vs GFP shRNA knockdown. Diverging positions are reported if the LLR ratio  
762 exceeds 1.0.

763

#### 764 *Recombinant mouse APOBEC2 production*

765 Recombinant His<sub>6</sub>-tagged mouse APOBEC2 proteins were produced in Sf21 insect cells by  
766 the EMBL Protein Expression and Purification Core Facility. The genes encoding mouse  
767 APOBEC2 were cloned into the pFastBac HTa vector (Thermo) and these constructs were

768 used for transposition into *E. coli* DH10EMBacY cells (Geneva Biotech). The isolated bacmid  
769 DNA was utilised for generation of the recombinant baculoviruses. For the mouse APOBEC2  
770 protein production, 5 mL of baculovirus was used to infect 1 L of Sf21 cells at a density of  $1 \times$   
771  $10^6$  cells/ml. After 72h, the cells were harvested by centrifugation (30 min, 600 x g, 4°C) and  
772 resuspended in lysis buffer (20 mM Tris pH 8.0, 800 mM NaCl, 20 mM imidazole and 5 mM  
773  $\beta$ -mercaptoethanol) supplemented with benzonase, 10 mM MgCl<sub>2</sub> and cOmplete EDTA-free  
774 protease inhibitors (Roche). The cells were lysed using a Dounce homogenizer and the  
775 lysate was cleared by centrifugation (30 min, 20000 x g, 4°C). The cleared lysate was  
776 loaded onto a 5 mL Ni-NTA column (Macherey-Nagel). After washing with a buffer consisting  
777 of 20 mM Tris pH 8.0, 300 mM NaCl, 20 mM imidazole and 5 mM  $\beta$ -mercaptoethanol, the Ni-  
778 NTA column was eluted using a gradient up to 300 mM imidazole. The elution fractions  
779 containing mouse APOBEC2 were pooled and dialysed overnight at 4°C to ion exchange  
780 buffer (20 mM Tris pH 8.0, 100 mM NaCl, 1 mM DTT). The dialysed sample was loaded onto  
781 a 5 mL HiTrap Heparin HP column (Cytiva) coupled to a 5 mL HiTrap Q HP anion exchange  
782 column (Cytiva). After washing, the HiTrap Heparin HP column and the HiTrap Q HP column  
783 were eluted separately in a gradient ranging from 100 mM to 1M NaCl. Finally, the mouse  
784 APOBEC2 protein eluted from the HiTrap Q HP column was subjected to a size exclusion  
785 chromatography (SEC) step using a HiLoad 16/600 Superdex 75 pg column (Cytiva) pre-  
786 equilibrated with SEC buffer (20 mM HEPES pH 7.5, 150 mM NaCl and 0.5 mM TCEP).  
787 When removal of the His<sub>6</sub>-tag was required, His<sub>6</sub>-tagged TEV protease (produced in-house)  
788 was added to the purified mouse APOBEC2 protein. After the overnight TEV cleavage step  
789 at 4°C, Ni-NTA beads (Qiagen) were added to the sample and incubated for 1h at 4°C. After  
790 centrifugation (1 min, 100 x g, 4°C), untagged mouse APOBEC2 was recovered from the  
791 flow through of the Ni-NTA beads. Recombinant mouse APOBEC2 proteins were aliquoted,  
792 flash-frozen with liquid N<sub>2</sub> and stored at -80°C. *Microscale Thermophoresis (MST)*

793  
794 Purified APOBEC2 was labeled using Cy5 Mono NHS Ester (GEPA15101, Sigma-Aldrich) at  
795 5 mg/mL protein and a 3:1 dye:protein ratio. Labeling reactions were performed in 20 mM  
796 HEPES, pH 7.5, 150 mM NaCl, and 0.5 mM Tris(2-carboxyethyl)phosphine (TCEP).  
797 Reactions were incubated overnight at 4°C with constant agitation. After incubation,  
798 reactions were deactivated using quencher buffer (ab102884, Abcam). Remaining dye was  
799 washed away by concentrating protein using Vivaspin® 500 centrifugal concentrators  
800 (Sartorius) into MST buffer (10 mM HEPES pH 7.5, 50 mM NaCl, 5 mM MgCl<sub>2</sub>). The degree  
801 of labeling was typically at about 1.

802  
803 Oligonucleotides (oligos) were ordered from Sigma-Aldrich: SP/KLF motif F: GGC GGC  
804 GCG GCC CCG CCC CCT CCT CCG GC; SP/KLF motif R: GCC GGA GGA GGG GGC  
805 GGG GCC GCG CCG CC; A-tract motif F: TCT CAA GAA AAA AAA AAA AAG AC; A-tract  
806 motif R: GTC TTT TTT TTT TTT TCT TGA GA.

807  
808 Oligonucleotides were annealed by incubating at 95°C and slow cooling to 25°C before  
809 storing at 4°C. Oligonucleotides were diluted to MST buffer + 0.05% Tween-20 for the final  
810 reaction. MST buffer was supplemented with 0.05% Tween-20. Cy5-labeled APOBEC2 was  
811 held constant at 50 nM while the oligonucleotides were titrated (1:1 dilution) between 19.53  
812 to 20,000 nM. Reactions were incubated for 30 min before loading into standard glass  
813 capillaries (MO-KO22, NanoTemper Technologies). MST measurements were performed  
814 using a Monolith NT.115 (NanoTemper Technologies) at 85% LED power and 40% MST  
815 power. Data represent 3 independent measurements. MO.Affinity Analysis v2.1.3454  
816 (NanoTemper Technologies) was used for curve fitting and calculating K<sub>d</sub> values with  
817 Thermophoresis + T Jump settings.

818  
819 *Electromobility shift assay (EMSA)*

820  
821 Oligos used for MST were labeled with [ $\gamma$ -<sup>32</sup>P] ATP and annealed with complementary oligos  
822 to form double-stranded (ds) oligos. Specified recombinant protein, mouse APOBEC2 and/or



823 human SP1 (Sigma, SRP2030), and ss or ds oligos were mixed in binding reaction buffer  
824 (10 mM HEPES pH 7.5, 50 mM NaCl, 5 mM MgCl<sub>2</sub>, 5% glycerol and 5 mM DTT) for 30  
825 minutes at room temperature. Reactions were resolved on 5% TBE gel (3450048, BioRad)  
826 with 0.5X TBE buffer (1610733, Bio-Rad) for 1.5 hours at 120 volts with the tank submerged  
827 on ice. Gels were then dried and imaged with a phosphorimager system (Azure Biosystems,  
828 Inc.).

829

### 830 **Acknowledgements**

831

832 The authors thank Dr. Diego Mourao-Sa for his insights and support during the completion of  
833 these studies; Dr. Thomas Carroll, for reproducing RNA-Seq and ChIP-Seq bioinformatics  
834 analyses; Dr. Pete Stavropoulos, Erik Debler, Philipp Schmiege and Nicholas Economos for  
835 initially producing APOBEC2 protein and mouse monoclonal (15e11) antibody; Dr. Frank  
836 Schwarz and GPCF@DKFZ for assistance with the MST experiments. We would like to  
837 thank Julia Flock and Dr. Kim Remans (Protein Expression and Purification Core Facility,  
838 EMBL) for producing the recombinant mouse APOBEC2 in Sf21 insect cells. Last but not  
839 least, FNP and LM would like to thank Dr Bruce McEwen (1938-2020) and Dr Karen Bulloch.  
840 Without their lasting support and encouragement this work would not have been completed.

841

### 842 **Funding**

843

844 This work is supported through funding by the Helmholtz Foundation to the DKFZ (FNP).  
845 Financial support was provided through the David Rockefeller Graduate Program (LM). Work  
846 in the JMDN lab is supported by the Canadian Institutes of Health Research grant PJT  
847 155944.JMDN in a merit scholar from The Fonds de recherche du Québec – Santé.  
848

### 849 **Author Contribution**

850 LM and JPL designed the study, performed experiments, analyzed data, and wrote the  
851 manuscript with supervision from FNP. SR for performing supplementary experiments. DH  
852 performed RNA editing analysis. ILR performed motif prediction and enrichment of ChIP-seq  
853 peaks analysis with supervision from JBZ. PGS and JR performed experimental work and JB  
854 performed analysis related to BioID data with supervision from JMDN. AV provided key  
855 reagent. CD performed DNA editing detection analysis. All authors wrote, read, and  
856 approved the final manuscript.

857

## Figure 1

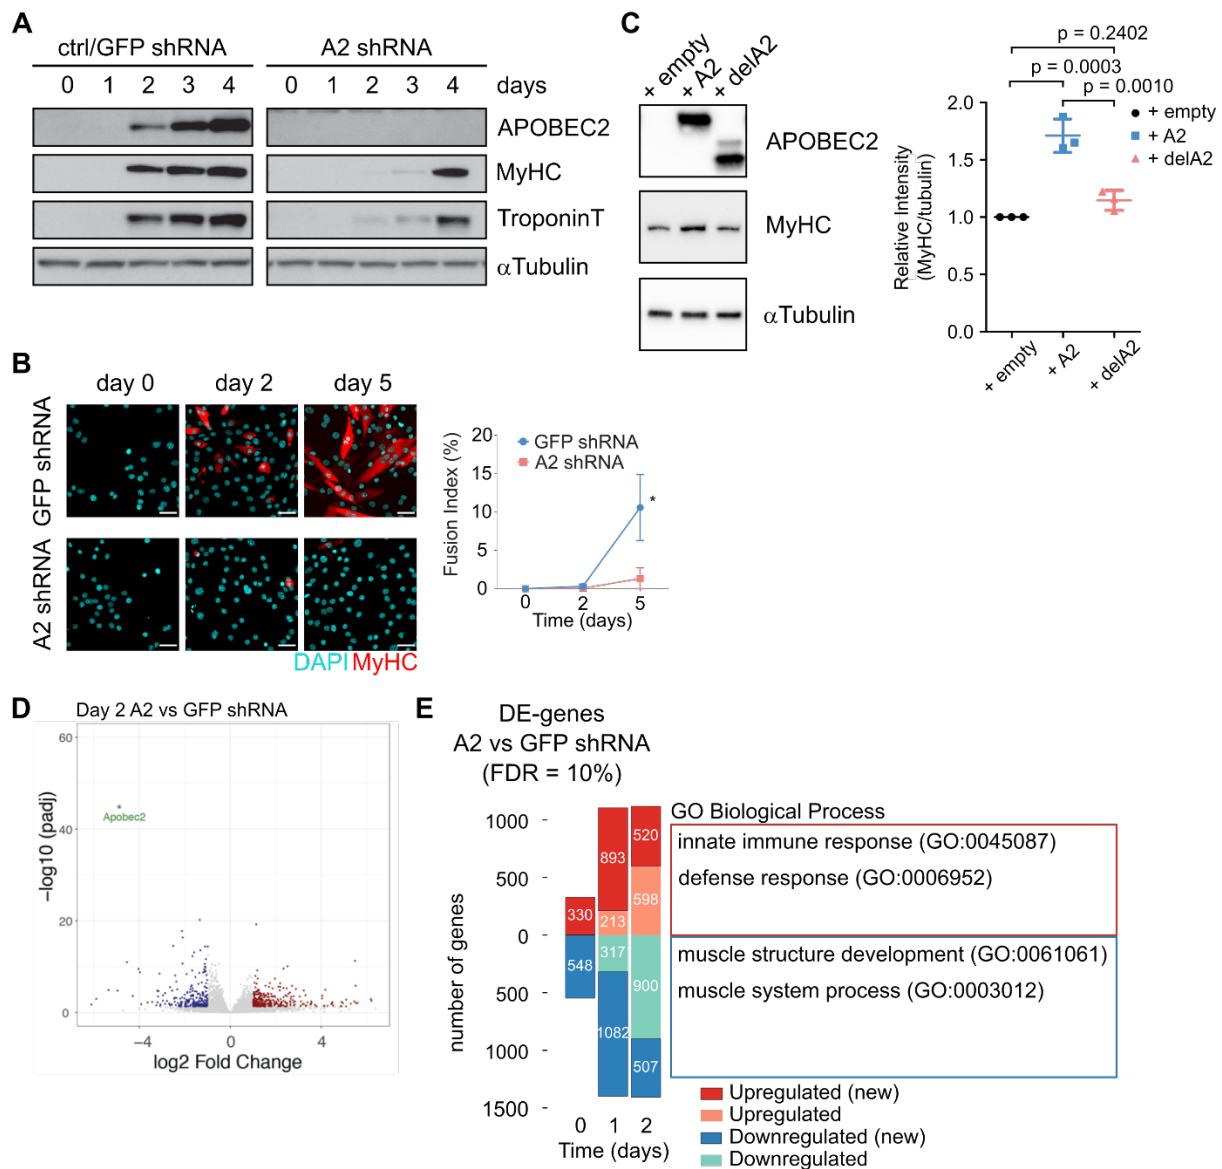

858

### 859 **Figure 1. APOBEC2 expression is required for myoblast differentiation**

860 **(A)** Cell lysates from C2C12 cell lines, ctrl/GFP shRNA and A2 shRNA, at different  
 861 timepoints of myoblast differentiation (day 0 to day 4) were analyzed by Western blot.  
 862 C2C12 myoblasts were transduced either with shRNA against GFP (ctrl/GFP shRNA) or  
 863 shRNA against APOBEC2 (A2 shRNA). MyHC (myosin heavy chain) and TroponinT were  
 864 used as markers of late differentiation;  $\alpha$ Tubulin, as loading control.

865

866 **(B)** C2C12 cell lines were fixed and immunostained using an antibody specific to MyHC  
 867 (red), DAPI (cyan) was used to stain for DNA. Scale bar = 50  $\mu$ m. Line plot shows  
 868 quantification of fusion index. Statistics: t test. Six fields of view were measured, and data is  
 869 shown as means (n = 3). Error bars indicate SD; \* =  $p < 0.05$ .

870

871 **(C)** C2C12 knockdown cell line (A2 shRNA) was transduced with retrovirus overexpressing  
 872 APOBEC2 or empty vector (+ empty: transduced with empty vector, + A2: with  
 873 APOBEC2 vector, and + delA2 with truncated APOBEC2). Cells were collected 96 hours  
 874 post-transduction. Cell lysates were prepared and analyzed by Western blot. Representative  
 875 blot from 3 independent biological replicates. Statistics: Ratio of MyHC mean intensity to  
 876  $\alpha$ Tubulin was normalized to corresponding + empty sample for each trial. Dot plot represent



877 mean with error bars representing standard deviation (n = 3). One-way ANOVA with Tukey's  
878 multiple comparisons test was performed to calculate p (adjusted P value).

879

880 **(D)** Volcano plot was generated using log<sub>2</sub> fold changes and p-adjusted values from  
881 comparing gene expression differences due to APOBEC2 knockdown at day 2 following  
882 induction of differentiation. Significantly differentially expressed genes with p adjusted value  
883 <0.05 are shown in red (upregulated) or blue (downregulated) and not significantly  
884 differentially expressed genes in gray. APOBEC2 is shown in green.

885

886 **(E)** Number of differentially expressed genes (DE-genes) between APOBEC2 knockdown  
887 (A2 shRNA) relative to GFP shRNA control. Colors indicate up- (red) and down-regulated  
888 (blue) genes. A false discovery rate (FDR) cutoff of 10% was used to determine DE-genes.  
889 Dark red and blue indicate newly differentially expressed genes at a given time point.  
890 Common GO Biological Process terms across day 0 to 2 from statistical enrichment test  
891 ranking genes by log<sub>2</sub>FoldChange (see Supplementary File 1 for complete output tables of  
892 the tests).

## Figure 2

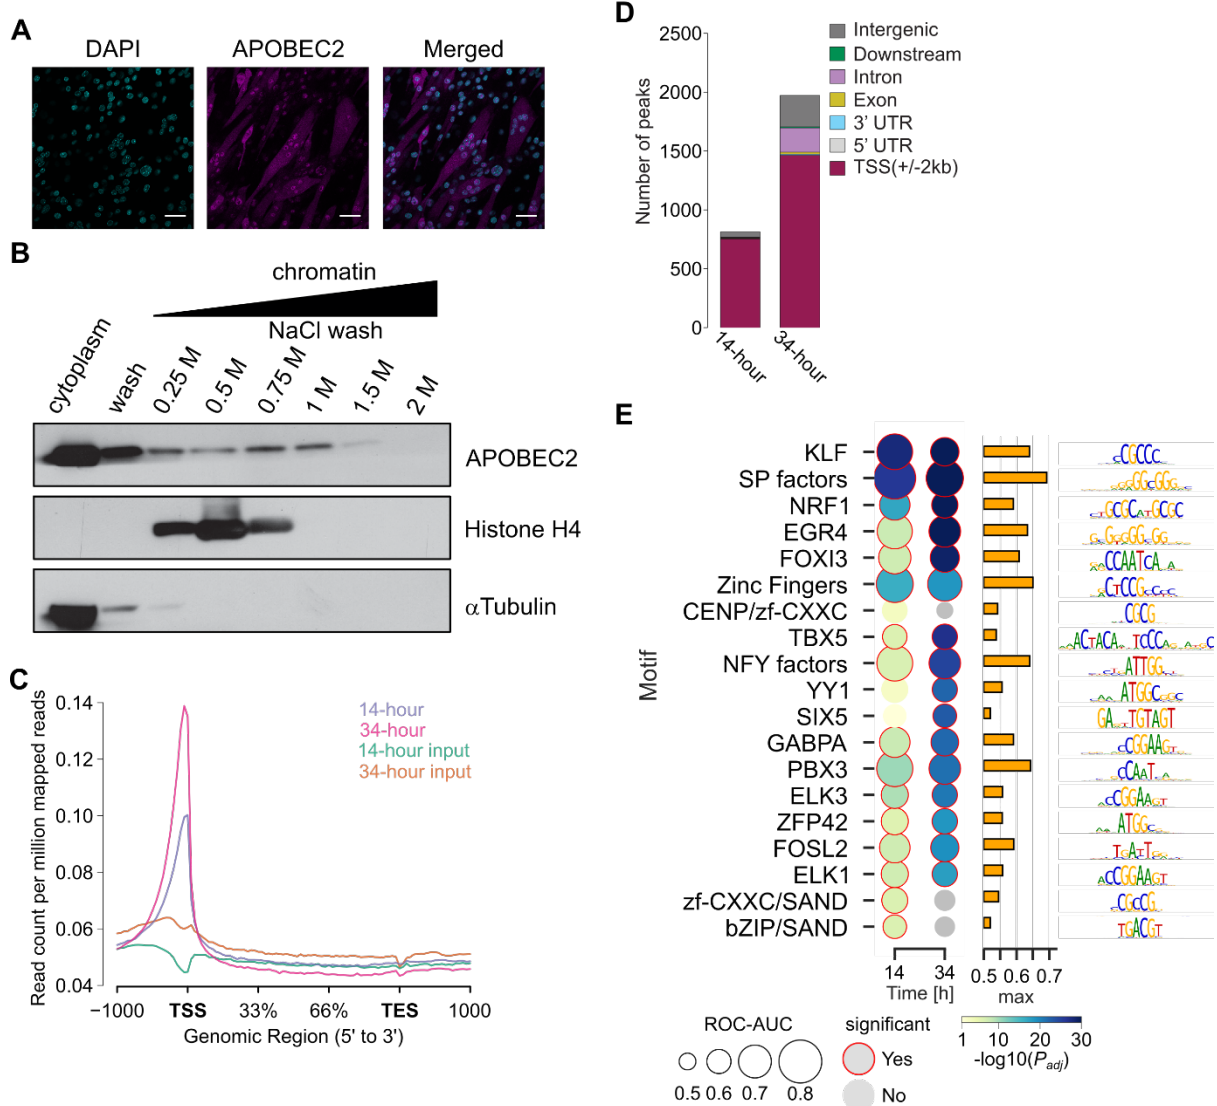

893  
894  
895  
896  
897

**Figure 2. APOBEC2 localization and ChIP-Seq in differentiating C2C12 myoblasts.**  
(A) Immunostaining of APOBEC2 (magenta) and DAPI-positive (blue) nuclei in differentiated C2C12 myoblasts (5 days in differentiation medium). Scale bar = 50  $\mu$ m.

(B) The sequential salt extraction profile of endogenous APOBEC2 and histone H4 are shown. alpha-tubulin is a cytoplasmic marker. The amount of indicated proteins in eluates was measured by Western blotting.

(C) The mean normalized APOBEC2 signal (plotted as read counts per million mapped reads) across all annotated genes. This plot shows the global differences in APOBEC2 binding between the two time points in TSS. Both time points are in biological triplicates.

(D) Genomic annotations of APOBEC2 consensus binding regions in each of the time points (14- and 34-hour). Binding regions are annotated based on genomic feature. The priority of assignment to a genomic feature when there is annotation overlap is: Promoter (2kb around the TSS), 5' UTR, 3' UTR, Exon, Intron, Downstream (within 3kb downstream of the end of the gene).

(E) Enrichment of 8-mers associated to 19 known transcription factors specificities (motifs) in APOBEC2 ChIP-seq regions, compared against negative genomic regions (see Methods). Receiver Operating Characteristic Area under the Curve (ROC-AUC, circle sizes) values are

915 descendently sorted on the y-axis by minimum adjusted P value observed in both time points  
916 (color). All 18 shown transcription factors are significant on at least one time point (adjusted  
917 P value < 0.1, using one-sided Wilcoxon rank sum test and Benjamini-Hochberg correction.  
918 Red circles). Right barplot indicates maximum ROC-AUC value, row-wise. Right sequence  
919 logos depict unsupervised alignment of all 8-mers referred to that transcription factor motif <sup>29</sup>.

## Figure 3

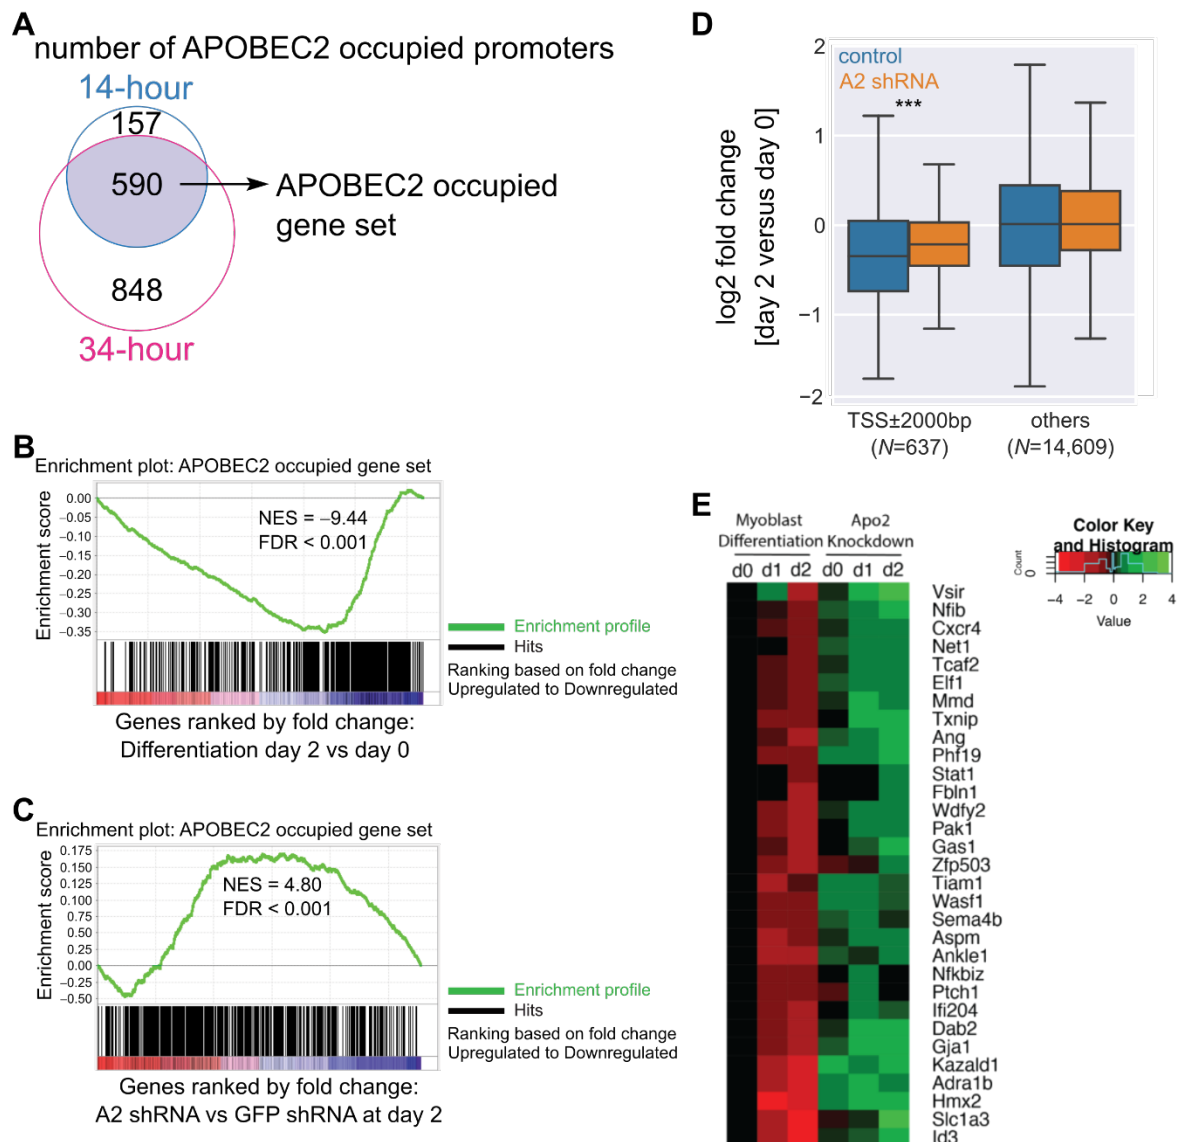

**Figure 3. APOBEC2 binding at specific transcription factor DNA motifs.**

(A) The Venn diagram represents the number of genes that have APOBEC2 occupancy on their promoters at 14- and 34-hour time points. The genes that show consistent APOBEC2 occupancy in their promoters at both time points were used to create an APOBEC2 occupied gene set as shown in the Venn diagram.

(B,C) Gene set enrichment analysis (GSEA) (Subramanian et al., 2005) was used to test the enrichment of the APOBEC2 occupied gene set in the list of genes that are differentially expressed through differentiation (C) or the ones that are differentially expressed due to APOBEC2 knockdown at day 2 (D). The enrichment profile over the whole ranked gene set is shown in green with normalized enrichment score (NES) and FDR values. Gene hits are shown as black lines. A positive NES indicates gene set enrichment at the top (positive/up fold change) of the ranked list; a negative NES indicates gene set enrichment at the bottom (negative/down fold change) of the ranked list.

(D) Expression changes for genes in control (GFP control shRNA) and A2 knockdown (A2 shRNA) C2C12 during differentiation. Genes are grouped by the presence of an APOBEC2

920  
921

922

923

924

925

926

927

928

929

930

931

932

933

934

935

936

937

938

939

940 ChIP-seq peak nearby Transcription Start Sites (TSS) at not more than 2000bp from it, or  
941 genome wide background (others). Asterisks indicate adjusted P values, by two-sided t-test  
942 corrected using Benjamini Hochberg procedure (\*\*\*=0.001).

943

944 **(E)** Heatmap showing expression changes of genes related to differentiation (regulation of  
945 differentiation, GO: 0045595) occupied by A2 during differentiation in C2C12 cells and A2  
946 knockdown cells. The list of APOBEC2 repressed genes were filtered from the C2C12  
947 RNASeq data of A2 occupied genes (defined as genes with A2-ChIPSeq peak in the  
948 promoter region). Genes repressed during differentiation log<sub>2</sub> fold change greater than 0.58  
949 (absolute fold change > 1.5) at day 1 or 2 of differentiation and upregulated in the  
950 knockdown (versus control) at day 0, 1, or 2 were selected. These genes were then used as  
951 input for statistical overrepresentation test – GO biological processes through Panther (ver  
952 14) with the default settings using all *M. musculus* genes in database as reference list<sup>81</sup>.

## Figure 4

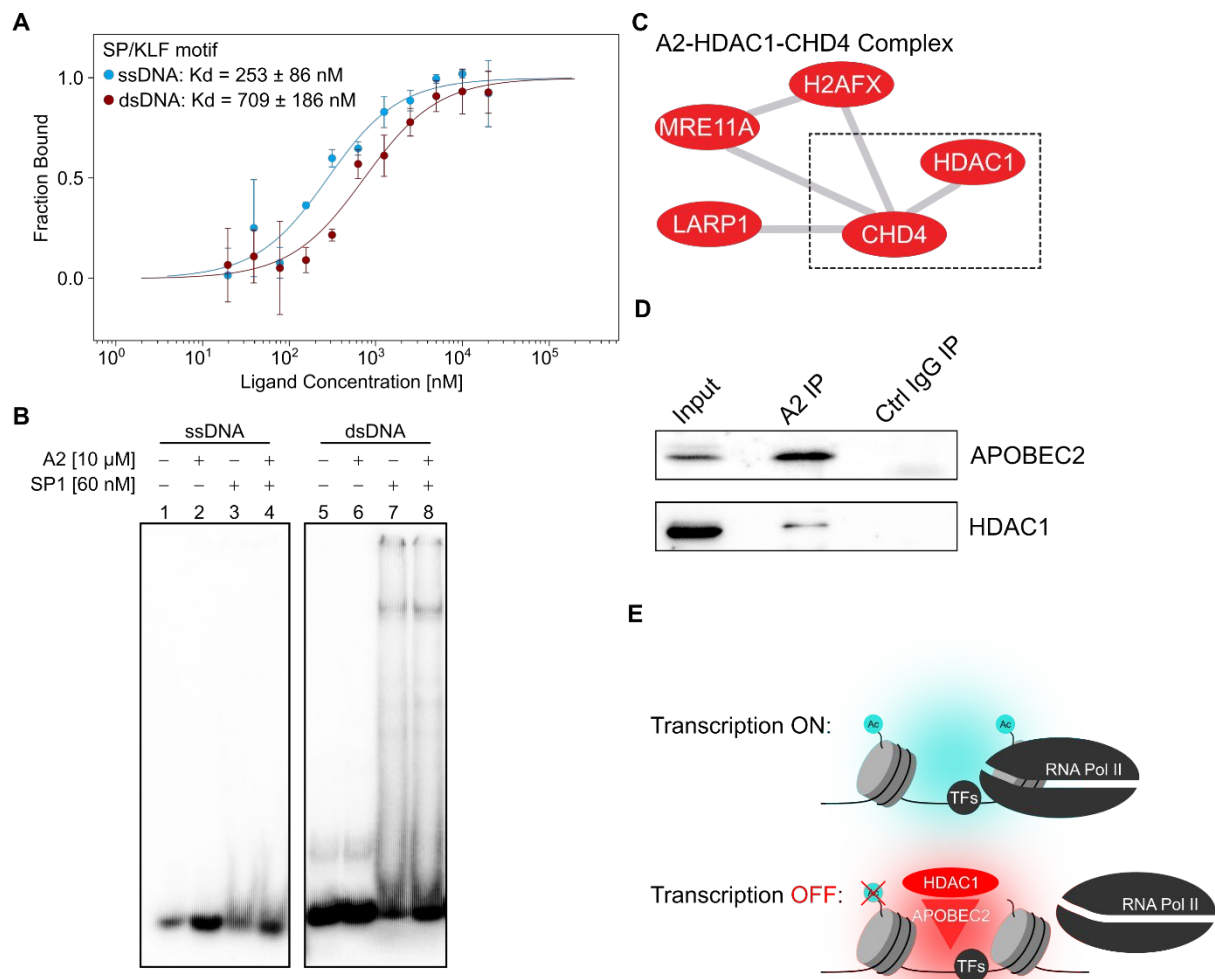

953

954

### 955 **Figure 4. APOBEC2 recruits the HDAC1 co-transcriptional repressor complex.**

956 **(A)** Microscale thermophoresis (MST) experiments measuring purified APOBEC2 binding to  
 957 single-stranded DNA (ssDNA) or double-stranded (dsDNA) SP/KLF motif. Cy5-labeled  
 958 APOBEC2 was kept constant (50 nM) while the concentration of non-labeled SP/KLF motif  
 959 was titrated (1:1 dilution) between 20 nM – 20,000 nM. The calculated  $K_d$  was computed  
 960 using the standard settings (thermophoresis + T jump) with the MO.Affinity Analysis v2.1  
 961 (NanoTemper Technologies). Values represent 3 independent measurements with error  
 962 bars representing the standard deviation.

963

964 **(B)** Electrophoretic mobility shift assays (EMSA) of recombinant mouse APOBEC2 and  
 965 human SP1 protein on either ss or dsDNA with an SP/KLF motif. Radioactively labeled ss or  
 966 dsDNA (1 nM) was mixed with either recombinant APOBEC2 (10  $\mu$ M) or SP1 (60 nM)  
 967 protein, or both. Gel shift image is representative of at least 3 independent experiments.

968

969 **(C)** Selected protein complex identified by APOBEC2 proximity-dependent protein  
 970 biotinylation (BioID). Each red node corresponds to a protein that was identified by BioID  
 971 mass spectrometry to interact with APOBEC2. CHD4 was also identified in a BioID data  
 972 comparing APOBEC2 and AID in mouse B cells<sup>82</sup>. The edges denote the known interactions  
 973 of these proteins with each other (see Figure S5B for other complexes).

974 **(D)** Co-immunoprecipitation (Co-IP) of APOBEC2 with HDAC1 in C2C12 myoblasts  
 975 differentiated to myotubes for 4 days. Nuclear protein lysates (Input) were incubated with



976 beads conjugated to either APOBEC2 antibody (A2 IP) or IgG isotype control antibody (Ctrl  
977 IgG IP). Proteins were then eluted, ran on an SDS-PAGE gel, and blotted with APOBEC2, or  
978 HDAC1 antibodies.

979

980 **(E)** Proposed molecular function of APOBEC2 as a co-transcriptional repressor complex that  
981 acts on active/open chromatin to repress transcription through HDAC1 histone deacetylation  
982 during myoblast differentiation.

## Figure S1

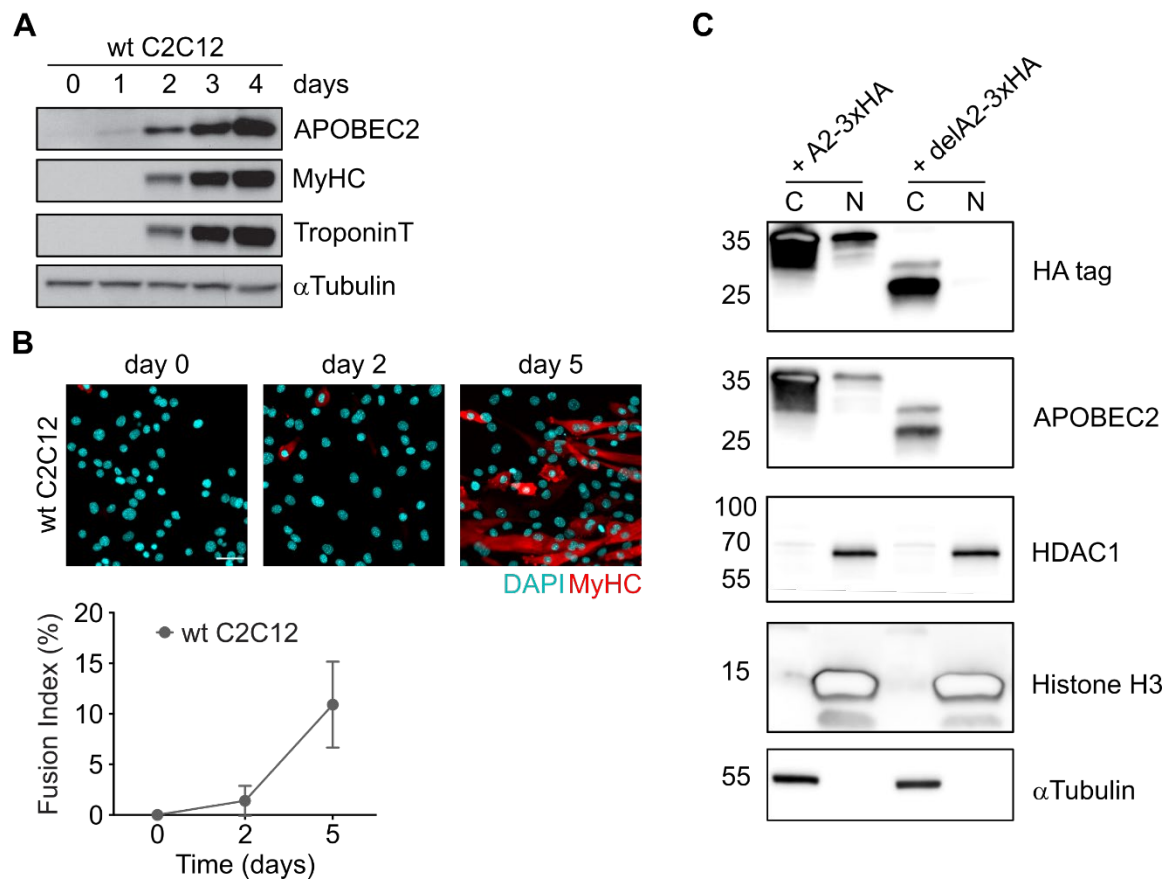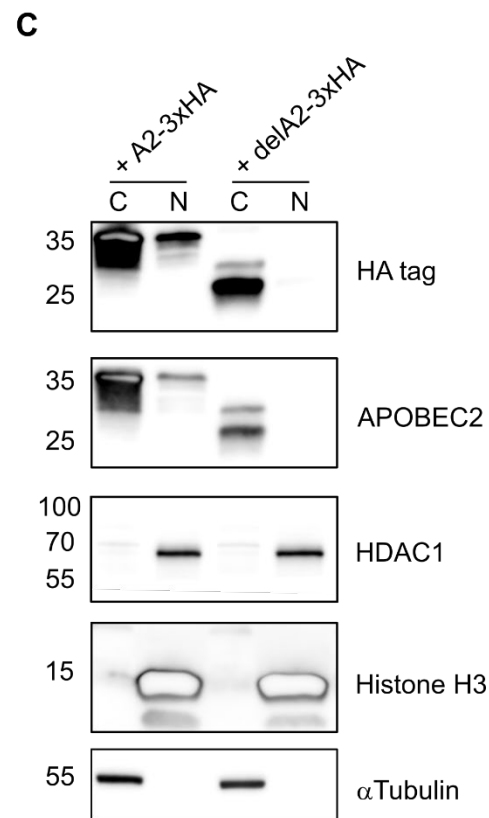

983  
984

### Supplementary Figure 1. C2C12 myoblast differentiation

985  
986 (A) Whole cell extracts of mouse wildtype (wt) C2C12 myoblasts and myotubes were  
987 analyzed by Western blotting using anti-APOBEC2 antibodies. MyHC and TroponinT were  
988 used as markers of late differentiation, alpha-tubulin was used as loading control.

989  
990 (B) C2C12 cells were cultured in differentiation medium for 0, 2 and 5 days, fixed, and  
991 stained with antibody to MyHC (red). Nuclei were visualized by DAPI staining (blue). Below  
992 the quantification of differentiation expressed as fusion index, which is the percentage  
993 MyHC-positive myotubes with >2 nuclei. Results are presented as means from quantification  
994 of at least 6 images/sample. Error bars indicate SD. Scale bar = 50  $\mu$ m.

995  
996 (C) Cytoplasmic and nuclear (C and N respectively) were taken from C2C12 cells  
997 transduced with vectors to overexpress 3xHA-tagged wildtype APOBEC2 (+ A2-3xHA) and  
998 truncated APOBEC2 (+ delA2-3xHA). Western blots were performed with respective lysates  
999 using antibodies against HA-tag, APOBEC2, HDAC1, Histone H3, and  $\alpha$ Tubulin.

## Figure S2

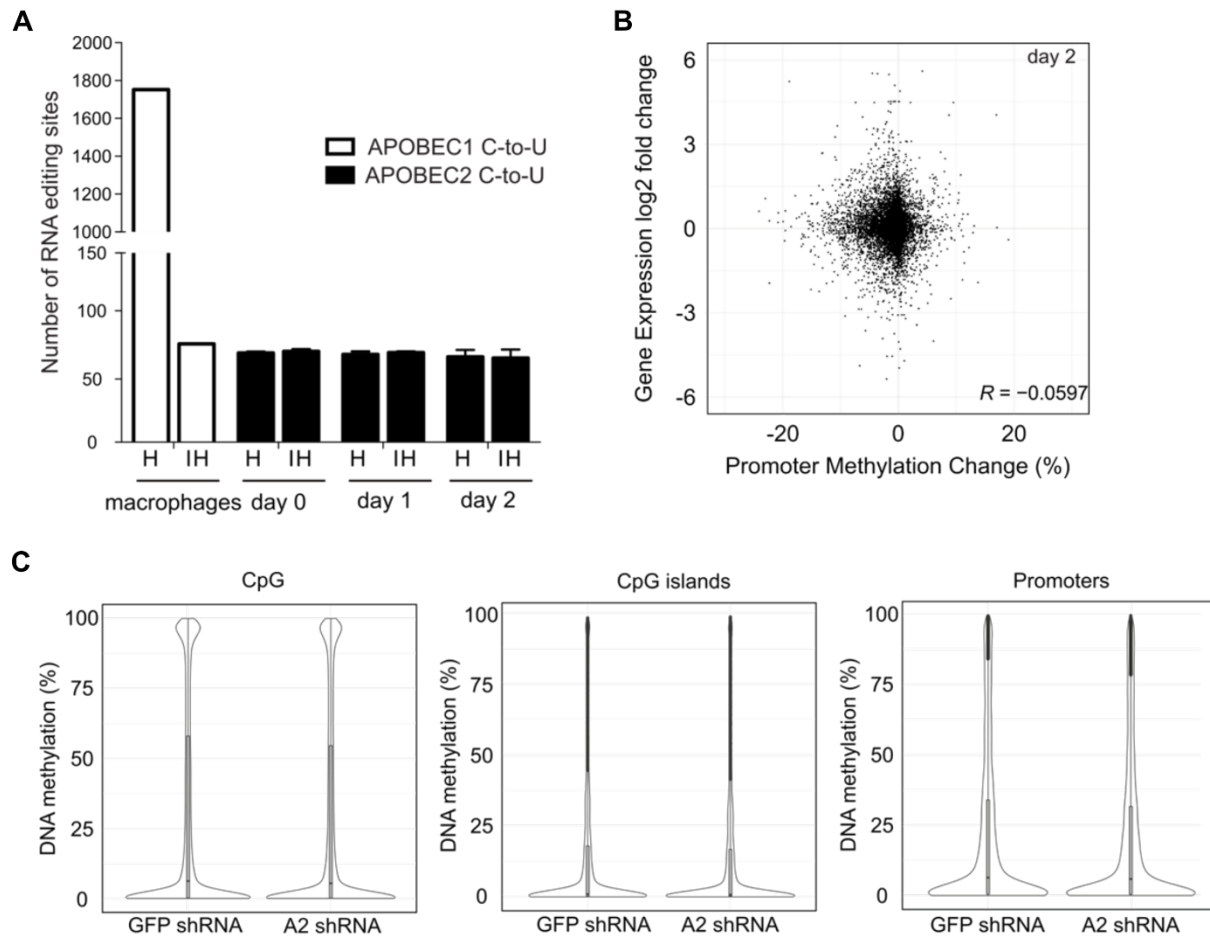

1000  
1001

### Supplementary Figure 2. mRNA editing and DNA demethylation in C2C12 myoblasts

1002 **(A)** Candidate C-to-U RNA editing sites called from APOBEC2 knockdown samples, control  
1003 (GFPsh) at day 0, 1, and 2 in DM in C2C12s and wild-type and APOBEC1<sup>-/-</sup> macrophages  
1004 (positive control). Hits (H) represent candidate editing sites present in control (GFPsh) but  
1005 not in APOBEC2 knockdown dataset (in positive control hits are the # of sites in APOBEC1<sup>-/-</sup>  
1006 dataset.) Inverse hits (IH) represent putative edited sites yielded when the inverse  
1007 comparison is made, thus edit sites present in the APOBEC2 knockdown dataset but not in  
1008 the control (GFPsh) (for the positive control edit sites that are present in APOBEC1<sup>-/-</sup>  
1009 dataset but not in wild-type). Data are represented as means  $\pm$  SD using outputs of 3 RNA-  
1010 Seq datasets.  
1011

1012 **(B)** Methylation changes across all the represented promoters in the ERRBS dataset  
1013 compared with the expression changes of the same genes in RNA-Seq dataset. Shown here  
1014 are datasets from the day 2 timepoint.  $R$  = Pearson's correlation coefficient.  
1015  
1016

1017 **(C)** Distribution of DNA methylation frequencies in C2C12s as determined by ERRBS for  
1018 individual CpGs, CpG islands and promoters. Promoters are defined at  $\pm$  2Kb around the  
1019 TSS in Ensemble annotations. CpG islands were taken from the cpGIslandExt track of the  
1020 UCSC table browser. Violin plots represent the distribution of DNA methylation frequencies  
1021 for each feature. Median and first and third quartiles are shown with the box plots.

**Figure S3**

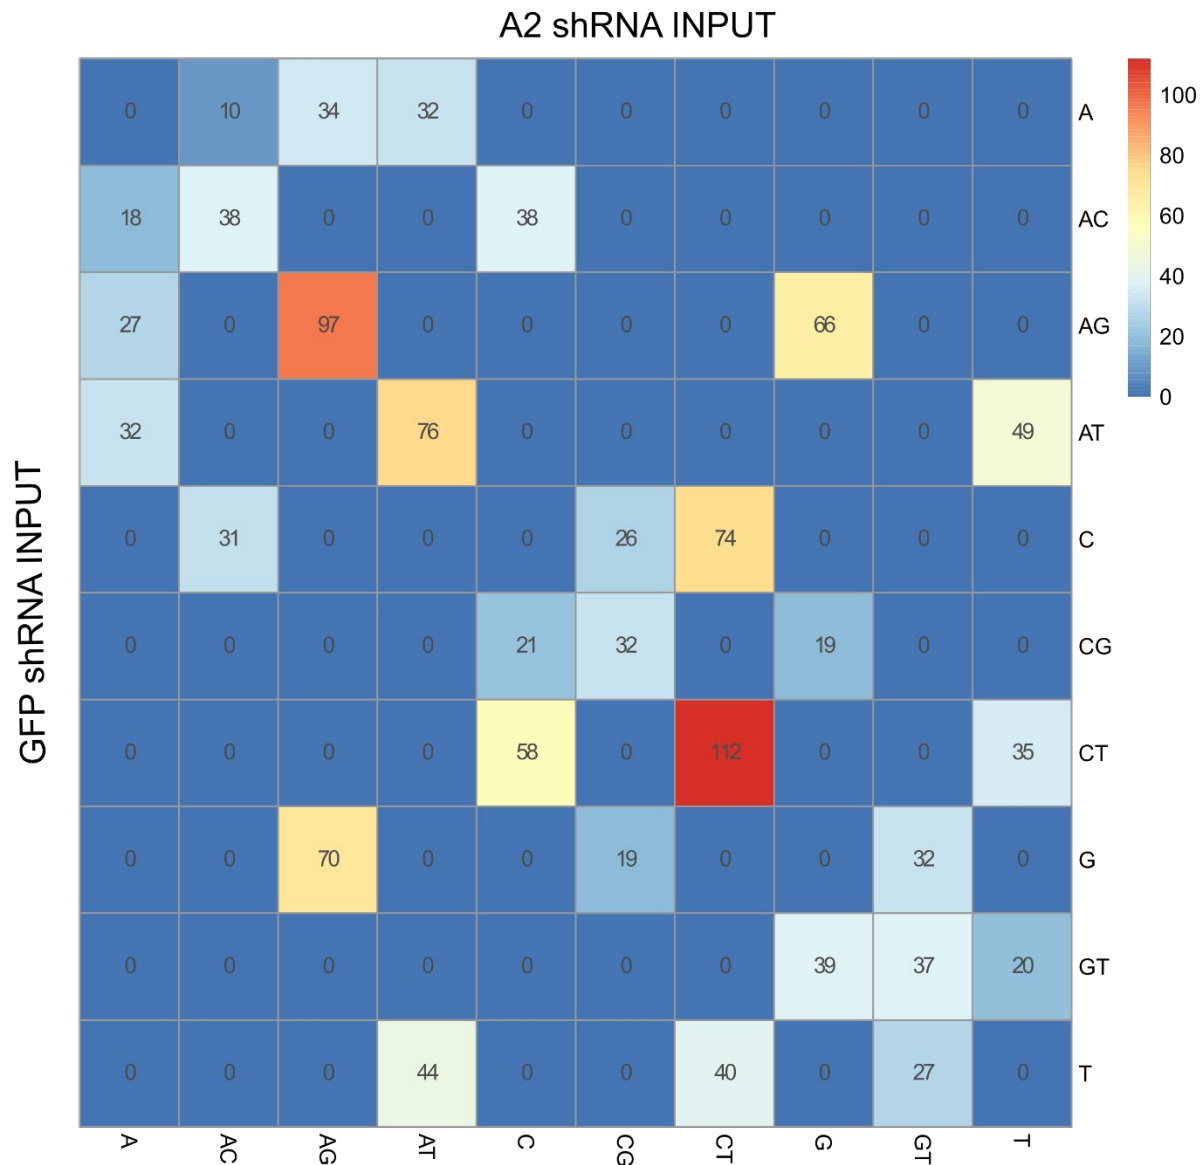

1022  
1023  
1024  
1025  
1026

**Supplementary Figure 3. DNA Editing in APOBEC2 knockdown versus control (GFP shRNA)**

1027 Pairwise heatmap - This is a head-to-head comparison of variant positions between the 2  
1028 input sample sets. The symmetry of the heatmap indicates that there is no preference for a  
1029 unidirectional base substitution process.

## Figure S4

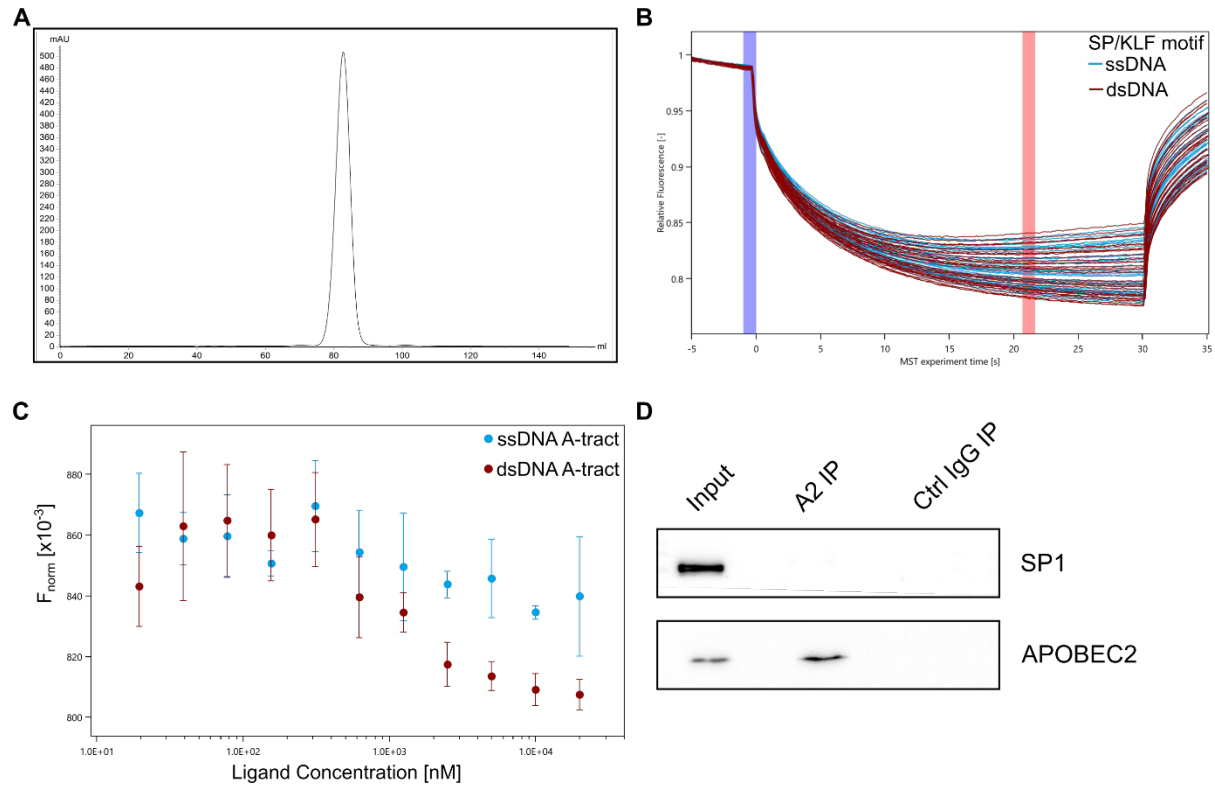

1030  
1031

### Supplementary Figure 4. Recombinant APOBEC2 electromobility shift assays

1032 **(A)** Size exclusion chromatogram (Superdex 200, GE Healthcare) of recombinant 6x-His-  
1033 APOBEC2 produced in High Five/Sf9 (Thermo) insect cells.

1034 **(B)** MST trace for APOBEC2 interaction with ssDNA and dsDNA SP/KLF motifs. Traces  
1035 correspond to experiment in Figure 4A. Blue and red highlighted regions represent cold and  
1036 hot regions respectively that were used for the standard thermophoresis+ T-jump analysis.

1037 **(C)** MST experiments measuring purified APOBEC2 binding to single-stranded DNA  
1038 (ssDNA) or double-stranded (dsDNA) with A-tract motif. Cy5-labeled APOBEC2 was kept  
1039 constant (50 nM) while the concentration of non-labeled SP/KLF motif was titrated (1:1  
1040 dilution) between 20 nM – 20,000 nM. Normalized fluorescence ( $F_{norm}$ ) values and graph  
1041 were produced with MO.Affinity Analysis v2.1 (NanoTemper Technologies). Values  
1042 represent 3 independent measurements with error bars representing the standard deviation.

1043 **(D)** Co-immunoprecipitation (Co-IP) of APOBEC2 with SP1 in C2C12 myoblasts  
1044 differentiated to myotubes for 4 days. Nuclear protein lysates (Input) were incubated with  
1045 beads conjugated to either APOBEC2 antibody (A2 IP) or IgG isotype control antibody (Ctrl  
1046 IgG IP). Proteins were then eluted, ran on an SDS-PAGE gel, and blotted with APOBEC2, or  
1047 SP1 antibodies.





1062 GFP-BirA control cells. Nodes in blue indicate proteins that were preferentially labeled by  
1063 APOBEC2-BirA compared to AID-BirA in mouse B lymphocytes in a previously published  
1064 dataset <sup>82</sup>. The edges denote the known interactions of these proteins with each as  
1065 described in Methods.

1066 **References**

- 1067
- 1068 1. Conticello, S. G. The AID/APOBEC family of nucleic acid mutators. *Genome Biol.* **9**,
  - 1069 229 (2008).
  - 1070 2. Salter, J. D., Bennett, R. P. & Smith, H. C. The APOBEC Protein Family: United by
  - 1071 Structure, Divergent in Function. *Trends Biochem. Sci.* **41**, 578–594 (2016).
  - 1072 3. Cole, D. C. *et al.* Loss of APOBEC1 RNA-editing function in microglia exacerbates
  - 1073 age-related CNS pathophysiology. *Proc. Natl. Acad. Sci.* **114**, 13272–13277 (2017).
  - 1074 4. Rayon-Estrada, V. *et al.* Epitranscriptomic profiling across cell types reveals
  - 1075 associations between APOBEC1-mediated RNA editing, gene expression outcomes,
  - 1076 and cellular function. *Proc. Natl. Acad. Sci.* **114**, 13296–13301 (2017).
  - 1077 5. Harris, R. S. & Dudley, J. P. APOBECs and virus restriction. *Virology* vols 479–480
  - 1078 131–145 (2015).
  - 1079 6. Rai, K. *et al.* DNA Demethylation in Zebrafish Involves the Coupling of a Deaminase,
  - 1080 a Glycosylase, and Gadd45. *Cell* **135**, 1201–1212 (2008).
  - 1081 7. Guo, J. U., Su, Y., Zhong, C., Ming, G. & Song, H. Hydroxylation of 5-Methylcytosine
  - 1082 by TET1 Promotes Active DNA Demethylation in the Adult Brain. *Cell* **145**, 423–434
  - 1083 (2011).
  - 1084 8. Krishnan, A., Iyer, L. M., Holland, S. J., Boehm, T. & Aravind, L. Diversification of
  - 1085 AID/APOBEC-like deaminases in metazoa: multiplicity of clades and widespread roles
  - 1086 in immunity. *Proc. Natl. Acad. Sci. U. S. A.* **115**, E3201–E3210 (2018).
  - 1087 9. Liao, W. *et al.* APOBEC-2, a Cardiac- and Skeletal Muscle-Specific Member of the
  - 1088 Cytidine Deaminase Supergene Family. *Biochem. Biophys. Res. Commun.* **260**, 398–
  - 1089 404 (1999).
  - 1090 10. Sato, Y. *et al.* Deficiency in APOBEC2 Leads to a Shift in Muscle Fiber Type,
  - 1091 Diminished Body Mass, and Myopathy. *J. Biol. Chem.* **285**, 7111–7118 (2010).
  - 1092 11. Etard, C., Roostalu, U. & Strähle, U. Lack of Apobec2-related proteins causes a
  - 1093 dystrophic muscle phenotype in zebrafish embryos. *J. Cell Biol.* **189**, 527–39 (2010).
  - 1094 12. Powell, C., Elsaiedi, F. & Goldman, D. Injury-Dependent Muller Glia and Ganglion Cell
  - 1095 Reprogramming during Tissue Regeneration Requires Apobec2a and Apobec2b. *J.*
  - 1096 *Neurosci.* **32**, 1096–1109 (2012).
  - 1097 13. Vonica, A., Rosa, A., Arduini, B. L. & Brivanlou, A. H. APOBEC2, a selective inhibitor
  - 1098 of TGF $\beta$  signaling, regulates left-right axis specification during early embryogenesis.
  - 1099 *Dev. Biol.* **350**, 13–23 (2011).
  - 1100 14. Okuyama, S. *et al.* Excessive activity of apolipoprotein B mRNA editing enzyme
  - 1101 catalytic polypeptide 2 (APOBEC2) contributes to liver and lung tumorigenesis. *Int. J.*
  - 1102 *cancer* **130**, 1294–301 (2012).
  - 1103 15. Lohr, J. G. *et al.* Discovery and prioritization of somatic mutations in diffuse large B-
  - 1104 cell lymphoma (DLBCL) by whole-exome sequencing. *Proc. Natl. Acad. Sci. U. S. A.*
  - 1105 **109**, 3879–84 (2012).
  - 1106 16. Powell, C., Cornblath, E. & Goldman, D. Zinc-binding Domain-dependent,
  - 1107 Deaminase-independent Actions of Apolipoprotein B mRNA-editing Enzyme, Catalytic
  - 1108 Polypeptide 2 (Apobec2), Mediate Its Effect on Zebrafish Retina Regeneration. *J. Biol.*
  - 1109 *Chem.* **289**, 28924–28941 (2014).
  - 1110 17. Yaffe, D. & Saxel, O. Serial passaging and differentiation of myogenic cells isolated
  - 1111 from dystrophic mouse muscle. *Nature* **270**, 725–7 (1977).
  - 1112 18. Carrió, E. *et al.* Muscle cell identity requires Pax7-mediated lineage-specific DNA
  - 1113 demethylation. *BMC Biol.* **14**, 30 (2016).
  - 1114 19. Prochnow, C., Bransteitter, R., Klein, M. G., Goodman, M. F. & Chen, X. S. The
  - 1115 APOBEC-2 crystal structure and functional implications for the deaminase AID.
  - 1116 *Nature* **445**, 447–451 (2007).
  - 1117 20. Krzysiak, T. C., Jung, J., Thompson, J., Baker, D. & Gronenborn, A. M. APOBEC2 Is
  - 1118 a Monomer in Solution: Implications for APOBEC3G Models. *Biochemistry* **51**, 2008–
  - 1119 2017 (2012).
  - 1120 21. Watanabe, Y. Conversion of myoblasts to physiologically active neuronal phenotype.

- 1121 *Genes Dev.* **18**, 889–900 (2004).
- 1122 22. Harjanto, D. *et al.* RNA editing generates cellular subsets with diverse sequence  
1123 within populations. *Nat. Commun.* **7**, 12145 (2016).
- 1124 23. Laffleur, B. *et al.* AID-induced remodeling of immunoglobulin genes and B cell fate.  
1125 *Oncotarget* **5**, 1118–1131 (2014).
- 1126 24. Chan, K. & Gordenin, D. A. Clusters of Multiple Mutations: Incidence and Molecular  
1127 Mechanisms. *Annu. Rev. Genet.* **49**, 243–267 (2015).
- 1128 25. Kosugi, S., Hasebe, M., Tomita, M. & Yanagawa, H. Systematic identification of cell  
1129 cycle-dependent yeast nucleocytoplasmic shuttling proteins by prediction of  
1130 composite motifs. *Proc. Natl. Acad. Sci.* **106**, 10171–10176 (2009).
- 1131 26. Patenaude, A.-M. *et al.* Active nuclear import and cytoplasmic retention of activation-  
1132 induced deaminase. *Nat. Struct. Mol. Biol.* **16**, 517–27 (2009).
- 1133 27. Porter, E. G., Connelly, K. E. & Dykhuizen, E. C. Sequential Salt Extractions for the  
1134 Analysis of Bulk Chromatin Binding Properties of Chromatin Modifying Complexes. *J.*  
1135 *Vis. Exp.* **2017**, (2017).
- 1136 28. Kohli, R. M. *et al.* Local Sequence Targeting in the AID/APOBEC Family Differentially  
1137 Impacts Retroviral Restriction and Antibody Diversification. *J. Biol. Chem.* **285**,  
1138 40956–40964 (2010).
- 1139 29. Mariani, L., Weinand, K., Vedenko, A., Barrera, L. A. & Bulyk, M. L. Identification of  
1140 Human Lineage-Specific Transcriptional Coregulators Enabled by a Glossary of  
1141 Binding Modules and Tunable Genomic Backgrounds. *Cell Syst.* **5**, 187-201.e7  
1142 (2017).
- 1143 30. Harris, R. S., Petersen-Mahrt, S. K. & Neuberger, M. S. RNA Editing Enzyme  
1144 APOBEC1 and Some of Its Homologs Can Act as DNA Mutators. *Mol. Cell* **10**, 1247–  
1145 1253 (2002).
- 1146 31. Mikl, M. C. *et al.* Mice Deficient in APOBEC2 and APOBEC3. *Mol. Cell. Biol.* **25**,  
1147 7270–7277 (2005).
- 1148 32. Torchy, M. P., Hamiche, A. & Klaholz, B. P. Structure and function insights into the  
1149 NuRD chromatin remodeling complex. *Cell. Mol. Life Sci.* **72**, 2491–507 (2015).
- 1150 33. Salter, J. D. & Smith, H. C. Modeling the Embrace of a Mutator: APOBEC Selection of  
1151 Nucleic Acid Ligands. *Trends Biochem. Sci.* **43**, 606–622 (2018).
- 1152 34. Vartanian, J., Guétard, D., Henry, M. & Wain-Hobson, S. Evidence for editing of  
1153 human papillomavirus DNA by APOBEC3 in benign and precancerous lesions.  
1154 *Science* **320**, 230–3 (2008).
- 1155 35. Law, E. K. *et al.* APOBEC3A catalyzes mutation and drives carcinogenesis in vivo. *J.*  
1156 *Exp. Med.* **217**, (2020).
- 1157 36. Nabel, C. S. *et al.* AID/APOBEC deaminases disfavor modified cytosines implicated in  
1158 DNA demethylation. *Nat. Chem. Biol.* **8**, 751–758 (2012).
- 1159 37. Powell, C., Grant, A. R., Cornblath, E. & Goldman, D. Analysis of DNA methylation  
1160 reveals a partial reprogramming of the Muller glia genome during retina regeneration.  
1161 *Proc. Natl. Acad. Sci.* **110**, 19814–19819 (2013).
- 1162 38. Gómez-Del Arco, P. *et al.* The Chromatin Remodeling Complex Chd4/NuRD Controls  
1163 Striated Muscle Identity and Metabolic Homeostasis. *Cell Metab.* **23**, 881–92 (2016).
- 1164 39. Boija, A. *et al.* Transcription Factors Activate Genes through the Phase-Separation  
1165 Capacity of Their Activation Domains. *Cell* **175**, 1842-1855.e16 (2018).
- 1166 40. Lee, Q. Y. *et al.* Pro-neuronal activity of Myod1 due to promiscuous binding to  
1167 neuronal genes. *Nat. Cell Biol.* **22**, 401–411 (2020).
- 1168 41. Mall, M. *et al.* Myt1l safeguards neuronal identity by actively repressing many non-  
1169 neuronal fates. *Nature* **544**, 245–249 (2017).
- 1170 42. Moffat, J. *et al.* A Lentiviral RNAi Library for Human and Mouse Genes Applied to an  
1171 Arrayed Viral High-Content Screen. *Cell* **124**, 1283–1298 (2006).
- 1172 43. Orimo, A. *et al.* Stromal Fibroblasts Present in Invasive Human Breast Carcinomas  
1173 Promote Tumor Growth and Angiogenesis through Elevated SDF-1/CXCL12  
1174 Secretion. *Cell* **121**, 335–348 (2005).
- 1175 44. Liao, Y., Smyth, G. K. & Shi, W. The Subread aligner: fast, accurate and scalable

- 1176 read mapping by seed-and-vote. *Nucleic Acids Res.* **41**, e108–e108 (2013).
- 1177 45. Lawrence, M., Gentleman, R. & Carey, V. rtracklayer: an R package for interfacing  
1178 with genome browsers. *Bioinformatics* **25**, 1841–1842 (2009).
- 1179 46. Lawrence, M. *et al.* Software for Computing and Annotating Genomic Ranges. *PLoS*  
1180 *Comput. Biol.* **9**, e1003118 (2013).
- 1181 47. Patro, R., Duggal, G., Love, M. I., Irizarry, R. A. & Kingsford, C. Salmon provides fast  
1182 and bias-aware quantification of transcript expression. *Nat. Methods* **14**, 417–419  
1183 (2017).
- 1184 48. Soneson, C., Love, M. I. & Robinson, M. D. Differential analyses for RNA-seq:  
1185 transcript-level estimates improve gene-level inferences. *F1000Research* **4**, 1521  
1186 (2015).
- 1187 49. Love, M. I., Huber, W. & Anders, S. Moderated estimation of fold change and  
1188 dispersion for RNA-seq data with DESeq2. *Genome Biol.* **15**, 550 (2014).
- 1189 50. Akalin, A. *et al.* Base-Pair Resolution DNA Methylation Sequencing Reveals  
1190 Profoundly Divergent Epigenetic Landscapes in Acute Myeloid Leukemia. *PLoS*  
1191 *Genet.* **8**, e1002781 (2012).
- 1192 51. Garrett-Bakelman, F. E. *et al.* Enhanced Reduced Representation Bisulfite  
1193 Sequencing for Assessment of DNA Methylation at Base Pair Resolution. *J. Vis. Exp.*  
1194 (2015) doi:10.3791/52246.
- 1195 52. Krueger, F. & Andrews, S. R. Bismark: a flexible aligner and methylation caller for  
1196 Bisulfite-Seq applications. *Bioinformatics* **27**, 1571–1572 (2011).
- 1197 53. Akalin, A. *et al.* methylKit: a comprehensive R package for the analysis of genome-  
1198 wide DNA methylation profiles. *Genome Biol.* **13**, R87 (2012).
- 1199 54. Li, S. *et al.* An optimized algorithm for detecting and annotating regional differential  
1200 methylation. *BMC Bioinformatics* **14**, S10 (2013).
- 1201 55. Carroll, T. S., Liang, Z., Salama, R., Stark, R. & de Santiago, I. Impact of artifact  
1202 removal on ChIP quality metrics in ChIP-seq and ChIP-exo data. *Front. Genet.* **5**,  
1203 (2014).
- 1204 56. Landt, S. G. *et al.* ChIP-seq guidelines and practices of the ENCODE and  
1205 modENCODE consortia. *Genome Res.* **22**, 1813–1831 (2012).
- 1206 57. Feng, J., Liu, T. & Zhang, Y. Using MACS to Identify Peaks from ChIP-Seq Data.  
1207 *Curr. Protoc. Bioinforma.* **34**, 2.14.1-2.14.14 (2011).
- 1208 58. Zhang, Y. *et al.* Model-based Analysis of ChIP-Seq (MACS). *Genome Biol.* **9**, R137  
1209 (2008).
- 1210 59. Yang, Y. *et al.* LEVERAGING BIOLOGICAL REPLICATES TO IMPROVE ANALYSIS  
1211 IN CHIP-SEQ EXPERIMENTS. *Comput. Struct. Biotechnol. J.* **9**, e201401002 (2014).
- 1212 60. Yu, G., Wang, L.-G. & He, Q.-Y. ChIPseeker: an R/Bioconductor package for ChIP  
1213 peak annotation, comparison and visualization. *Bioinformatics* **31**, 2382–2383 (2015).
- 1214 61. Zhu, L. J. Integrative Analysis of ChIP-Chip and ChIP-Seq Dataset. in *Methods in*  
1215 *Molecular Biology* 105–124 (Humana Press, 2013). doi:10.1007/978-1-62703-607-  
1216 8\_8.
- 1217 62. Zhu, L. J. *et al.* ChIPpeakAnno: a Bioconductor package to annotate ChIP-seq and  
1218 ChIP-chip data. *BMC Bioinformatics* **11**, 237 (2010).
- 1219 63. Subramanian, A. *et al.* Gene set enrichment analysis: A knowledge-based approach  
1220 for interpreting genome-wide expression profiles. *Proc. Natl. Acad. Sci.* **102**, 15545–  
1221 15550 (2005).
- 1222 64. Mi, H. *et al.* Protocol Update for large-scale genome and gene function analysis with  
1223 the PANTHER classification system (v.14.0). *Nat. Protoc.* **14**, 703–721 (2019).
- 1224 65. Morita, S., Kojima, T. & Kitamura, T. Plat-E: an efficient and stable system for  
1225 transient packaging of retroviruses. *Gene Ther.* **7**, 1063–6 (2000).
- 1226 66. Craig, R. & Beavis, R. C. TANDEM: matching proteins with tandem mass spectra.  
1227 *Bioinformatics* **20**, 1466–1467 (2004).
- 1228 67. Shteynberg, D. *et al.* iProphet: Multi-level Integrative Analysis of Shotgun Proteomic  
1229 Data Improves Peptide and Protein Identification Rates and Error Estimates. *Mol.*  
1230 *Cell. Proteomics* **10**, M111.007690 (2011).

- 1231 68. Liu, G. *et al.* ProHits: integrated software for mass spectrometry–based interaction  
1232 proteomics. *Nat. Biotechnol.* **28**, 1015–1017 (2010).
- 1233 69. Keller, A., Nesvizhskii, A. I., Kolker, E. & Aebersold, R. Empirical Statistical Model To  
1234 Estimate the Accuracy of Peptide Identifications Made by {MS}{MS} and Database  
1235 Search. *Anal. Chem.* **74**, 5383–5392 (2002).
- 1236 70. Nesvizhskii, A. I., Keller, A., Kolker, E. & Aebersold, R. A Statistical Model for  
1237 Identifying Proteins by Tandem Mass Spectrometry. *Anal. Chem.* **75**, 4646–4658  
1238 (2003).
- 1239 71. Teo, G. *et al.* SAINTexpress: Improvements and additional features in Significance  
1240 Analysis of INTeractome software. *J. Proteomics* **100**, 37–43 (2014).
- 1241 72. Anders, S. & Huber, W. Differential expression analysis for sequence count data.  
1242 *Genome Biol.* **11**, R106 (2010).
- 1243 73. Shannon, P. Cytoscape: A Software Environment for Integrated Models of  
1244 Biomolecular Interaction Networks. *Genome Res.* **13**, 2498–2504 (2003).
- 1245 74. Chatr-Aryamontri, A. *et al.* The BioGRID interaction database: 2017 update. *Nucleic  
1246 Acids Res.* **45**, D369–D379 (2017).
- 1247 75. Orchard, S. *et al.* The MIntAct project—IntAct as a common curation platform for 11  
1248 molecular interaction databases. *Nucleic Acids Res.* **42**, D358–D363 (2014).
- 1249 76. Morris, J. H. *et al.* clusterMaker: a multi-algorithm clustering plugin for Cytoscape.  
1250 *BMC Bioinformatics* **12**, 436 (2011).
- 1251 77. Huntley, R. P. *et al.* The GOA database: Gene Ontology annotation updates for 2015.  
1252 *Nucleic Acids Res.* **43**, D1057–D1063 (2015).
- 1253 78. Giurgiu, M. *et al.* CORUM: the comprehensive resource of mammalian protein  
1254 complexes-2019. *Nucleic Acids Res.* **47**, D559–D563 (2019).
- 1255 79. Merico, D., Isserlin, R., Stueker, O., Emili, A. & Bader, G. D. Enrichment map: a  
1256 network-based method for gene-set enrichment visualization and interpretation. *PLoS  
1257 One* **5**, e13984 (2010).
- 1258 80. Raudvere, U. *et al.* g:Profiler: a web server for functional enrichment analysis and  
1259 conversions of gene lists (2019 update). *Nucleic Acids Res.* **47**, W191–W198 (2019).
- 1260 81. Mi, H., Muruganujan, A., Ebert, D., Huang, X. & Thomas, P. D. PANTHER version 14:  
1261 more genomes, a new PANTHER GO-slim and improvements in enrichment analysis  
1262 tools. *Nucleic Acids Res.* **47**, D419–D426 (2019).
- 1263 82. Methot, S. P. *et al.* A licensing step links AID to transcription elongation for  
1264 mutagenesis in B cells. *Nat. Commun.* **9**, 1248 (2018).
- 1265
